# Supplementary material for: Stepwise cyclopropanation on the polycyclopropanated polyketide formation in jawsamycin biosynthesis
Source: Royal Society of Chemistry journal article supplement (doi:10.1039/c6ob02675c), 2016-12-22

## Supporting Information

### Stepwise Cyclopropanation on the Polycyclopropanated Polyketide Formation in Jawsamycin Biosynthesis

Tomoshige Hiratsuka, Hideaki Suzuki, Atsushi Minami, and Hideaki Oikawa\*

Division of Chemistry, Graduate School of Science, Hokkaido University, Sapporo 060-0810, Japan.

#### Table of Contents

|                                                                                                   |              |
|---------------------------------------------------------------------------------------------------|--------------|
| <b>Experimental section</b>                                                                       | Page S2      |
| <b>Figures</b>                                                                                    |              |
| Figure S1 : MS spectra of crude metabolites.                                                      | Page S4      |
| Figure S2 : MS/MS spectra of <b>2</b> and <b>1</b> .                                              | Page S5      |
| Figure S3-S13 : LC-HRMS and MS/MS analytical data of <sup>13</sup> C-labeled analogs.             | Page S6-S16  |
| Figure S14 : MS analysis of crude metabolites from jawsamycin producing <i>S. fervens</i> HP-891. | Page S17     |
| <b>Schemes</b>                                                                                    |              |
| Scheme S1 : Proposed biosynthetic pathway for <b>2a-4a</b> .                                      | Page S18     |
| Scheme S2 : Proposed biosynthetic pathway of U-106305.                                            | Page S19     |
| <b>Tables</b>                                                                                     |              |
| Table S1 : Number of polyketide isomers of <b>1</b> and <b>2</b> analogs.                         | Page S20     |
| Table S2 : Hypothetical chain elongation process.                                                 | Page S21     |
| Table S3 : NMR                                                                                    | Page S22-S23 |
| <b>NMR spectra</b>                                                                                | Page S24     |

## General.

All reagents commercially supplied were used as received.  $^1\text{H}$ - and  $^{13}\text{C}$ -NMR spectra were recorded on Bruker AMX-500 spectrometer. NMR spectra were recorded in  $(\text{CD}_3)_2\text{SO}$  (99.9 atom % enriched, Kanto).  $^1\text{H}$  chemical shifts were reported in  $\delta$  value based on internal  $(\text{CD}_3)_2\text{SO}$  (2.50 ppm) as a reference.  $^{13}\text{C}$  chemical shifts were reported in  $\delta$  value based on dimethyl sulfoxide (39.5 ppm) as a reference. Data are reported as follows: chemical shift, multiplicity (s = singlet, d = doublet, t = triplet, q = quartet, m = multiplet, br = broad), coupling constant (Hz), and integration. Mass spectra were obtained with a JEOL JMS-T100LP (ESI mode). Tandem MS analysis was conducted with a LTQ-Orbitrap XL (ThermoScientific).

## Feeding experiments of $^{13}\text{C}$ -labeled methionine.

Seed cultures (3.0 mL) of *S. lividans* TK23 harboring pJawA or pJawB<sup>1</sup> were inoculated to 20 mL of Soytone medium {50 g of D-glucose, 20 g of Soytone, 0.3 g of  $\text{KH}_2\text{PO}_4$ , 0.4 g of  $\text{K}_2\text{HPO}_4$  and 0.2 g of  $\text{MgSO}_4 \cdot 7\text{H}_2\text{O}$  per liter of water (pH 7.0)} containing thiostrepton (10  $\mu\text{g}/\text{mL}$ ) in 100 mL baffled shake flask and grown at 30°C for 2 days with agitation. The culture broth (0.3 mL) was further inoculated to 5.7 mL of Soytone broth containing thiostrepton (10  $\mu\text{g}/\text{mL}$ ) in 100 mL baffled shake flask. To this culture was added L-[Me- $^{13}\text{C}_1$ ]methionine (final concentration: 1 mg/mL). Cultivation was continued for an additional 3 days at 30°C. The culture broth was extracted with ethyl acetate and the organic layers were evaporated to dryness under reduced pressure. The crude mixture was dissolved in 300  $\mu\text{L}$  of acetonitrile and the sample solution (10  $\mu\text{L}$ ) was directly analysed by LC-MS/MS with InertSustain C18 (1.0 mm x 10 mm, GL science) using a linear gradient from 20% to 38% Solution B for 0–5 min, 38% to 45% for 5–30 min, 45% to 60% for 30–35 min, 60% to 100% for 35–36 min, 100% Solution B additional 9 min. Solution A: 98% of water and 2% of acetonitrile containing 0.1% formic acid, Solution B: 10% of water and 90% acetonitrile containing 0.1% formic acid.

## Isolation of jawsamycin analogs.

*S. lividans* TK23 harboring pJawA or pJawB was grown on Soytone medium (100 mL) containing thiostrepton (20  $\mu\text{g}/\text{mL}$ ) in baffled shake flask (500 mL). Fermentation was carried out for 1 week at 30°C with agitation. The culture broth (2.4 L) was extracted with ethyl acetate. The organic layers were evaporated to dryness under reduced pressure. The resultant was dissolved in a small volume of DMSO and purified by preparative HPLC. The crude extracts were separated by HPLC with Wakopack Navi C18-5 (10 mm x 250 mm, Wako) [column temperature, 30°C; flow rate, 2.5 mL/min] using a linear gradient from 70% to 74% acetonitrile for 0–14 min, 74% to 95% for 14–15 min, 95% acetonitrile additional 1 min, 95% to 70% for 16–16.5 min, and 70% acetonitrile for an additional 8.5 min. The crude fraction was further separated by the following HPLC conditions to give the following analogs;

**3** ( $\text{C}_{16}\text{-CP}_5$ ): The crude fraction containing **3** was purified by HPLC with Wakopack Navi C18-5 (10 mm x 250 mm, Wako) [column temperature, 30°C; flow rate, 2.5 mL/min] using a linear gradient from 55% to 55% acetonitrile for 0–17 min, 55% to 90% for 17–18 min, 95% to 55% for 18–18.5 min, and 55% acetonitrile for an additional 8.5 min to yield **3** (1.8 mg).

$[\alpha]_{\text{D}}^{20}$  -98.1 (c 0.094  $(\text{CH}_3)_2\text{SO}$ ). ESI-HR-MS (positive) calculated for  $\text{C}_{30}\text{H}_{40}\text{N}_3\text{O}_6$   $[\text{M}+\text{H}]^+$  538.2912,

found  $m/z$  538.2936. NMR data of **3** are summarized in Table S3.

**4** (C<sub>16</sub>-CP<sub>4</sub>): The crude fraction containing **4** was purified by HPLC with Wakopack Navi C18-5 (10 mm x 250 mm, Wako) [column temperature, 30°C; flow rate, 2.5 mL/min] using a linear gradient from 65% to 65% acetonitrile for 0–14 min, 65% to 95% for 14–15 min, 95% acetonitrile additional 1 min, 95% to 65% for 16–16.5 min, and 65% acetonitrile for an additional 8.5 min to yield **4** (2.6 mg).

$[\alpha]_D^{20}$  -211.3 (c 0.46 (CH<sub>3</sub>)<sub>2</sub>SO). ESI-HR-MS (positive) calculated for C<sub>29</sub>H<sub>38</sub>N<sub>3</sub>O<sub>6</sub> [M+H]<sup>+</sup> 524.2755, found  $m/z$  524.2727. NMR data of **4** are summarized in Table S3.

**2a** (C<sub>18</sub>-CP<sub>4</sub>): The crude fraction containing **2a** was purified by HPLC with Wakopack Navi C18-5 (10 mm x 250 mm, Wako) [column temperature, 30°C; flow rate, 2.5 mL/min] using a linear gradient from 72% to 72% acetonitrile for 0–14 min, 72% to 95% for 14–15 min, 95% acetonitrile additional 1 min, 95% to 72% for 16–16.5 min, and 72% acetonitrile for an additional 8.5 min to yield **2a** (1.0 mg).

$[\alpha]_D^{20}$  -60.4 (c 0.087 (CH<sub>3</sub>)<sub>2</sub>SO). ESI-HR-MS (positive) calculated for C<sub>31</sub>H<sub>40</sub>N<sub>3</sub>O<sub>6</sub> [M+H]<sup>+</sup> 550.2912, found  $m/z$  550.2865. NMR data of **2a** are summarized in Table S3.

**3a** (C<sub>16</sub>-CP<sub>4</sub>): The partially purified fraction containing **3a** and **4** was further purified by HPLC with Wakopack Navi C18-5 (4.6 mm x 250 mm, Wako) [column temperature, 30°C; flow rate, 1.0 mL/min] using an isocratic condition (48% acetonitrile) to yield **3a** (0.3 mg).

$[\alpha]_D^{20}$  -23.4 (c 0.033 (CH<sub>3</sub>)<sub>2</sub>SO). ESI-HR-MS (positive) calculated for C<sub>29</sub>H<sub>38</sub>N<sub>3</sub>O<sub>6</sub> [M+H]<sup>+</sup> 524.2755, found  $m/z$  524.2752. NMR data of **3a** are summarized in Table S3.

**4a** (C<sub>16</sub>-CP<sub>3</sub>): The crude fraction containing **4a** was purified by HPLC with Wakopack Navi C18-5 (10 mm x 250 mm, Wako) [column temperature, 30°C; flow rate, 2.5 mL/min] using a linear gradient from 60% to 60% acetonitrile for 0–14 min, 60% to 95% for 14–15 min, 95% acetonitrile additional 1 min, 95% to 60% for 16–16.5 min, and 60% acetonitrile for an additional 8.5 min to yield **4a** (1.6 mg) as a mixture of isomers (**4a**/isomer = 5/1 ratio).

$[\alpha]_D^{20}$  -39.7 (c 0.10 (CH<sub>3</sub>)<sub>2</sub>SO). ESI-HR-MS (positive) calculated for C<sub>28</sub>H<sub>36</sub>N<sub>3</sub>O<sub>6</sub> [M+H]<sup>+</sup> 510.2599, found  $m/z$  510.2590. NMR data of **4a** are summarized in Table S3.

## References

1. T. Hiratsuka, H. Suzuki, R. Kariya, T. Seo, A. Minami, H. Oikawa, *Angew. Chem. Int. Ed.* **2014**, *53*, 5423-5426.

**Figure S1.** MS spectra of crude metabolites obtained from (A) dehydrojawsamycin (**2**) producing transformant and (B) jawsamycin (**1**) producing transformant. (C) Isolated dehydrojawsamycin analogs corresponding to the observed molecular ion peaks.

(A)

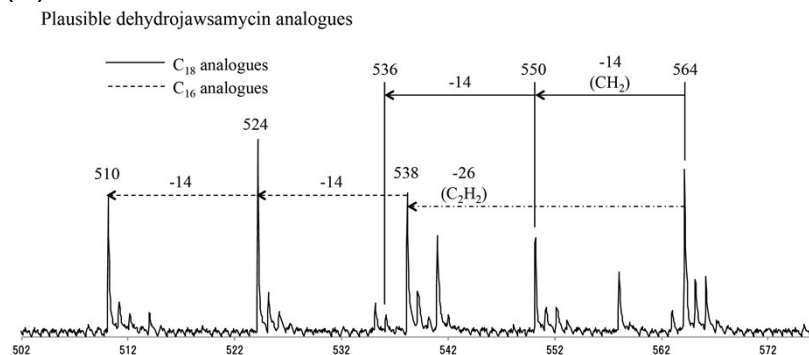

(B)

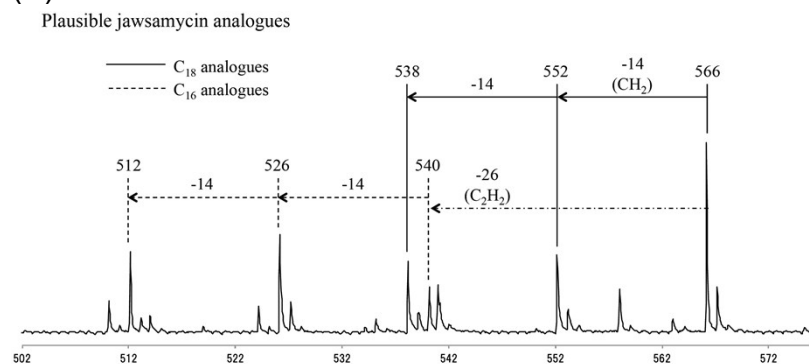

(C)

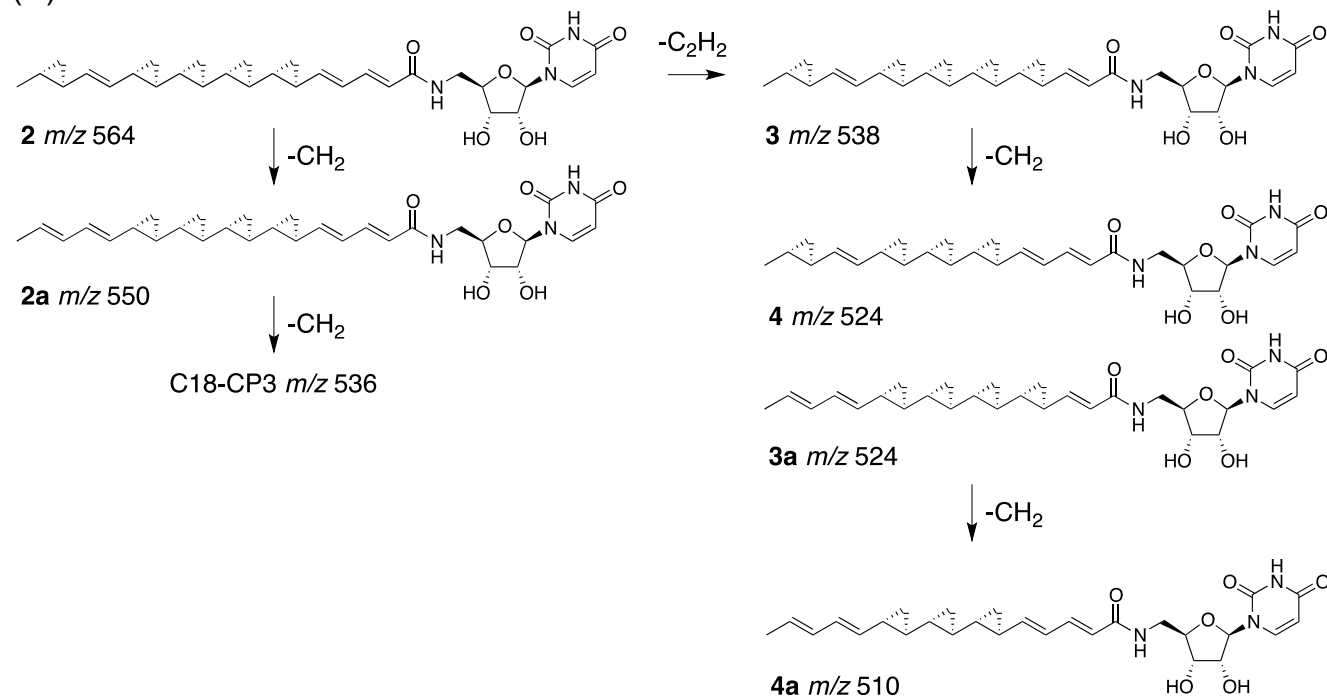

**Figure S2.** MS/MS spectra of **2** and **1**.

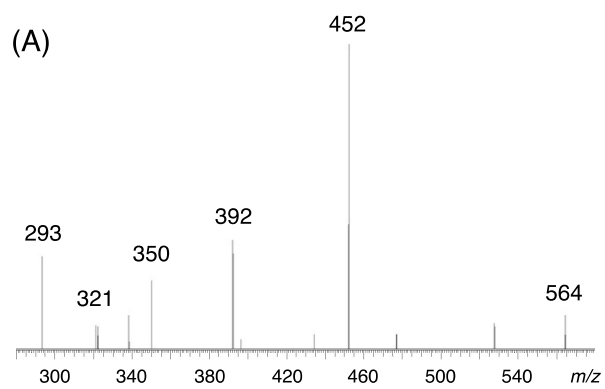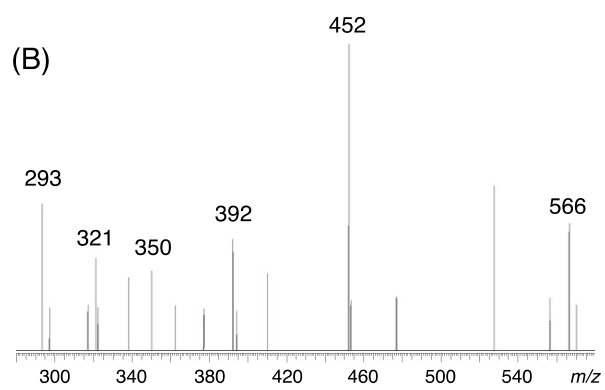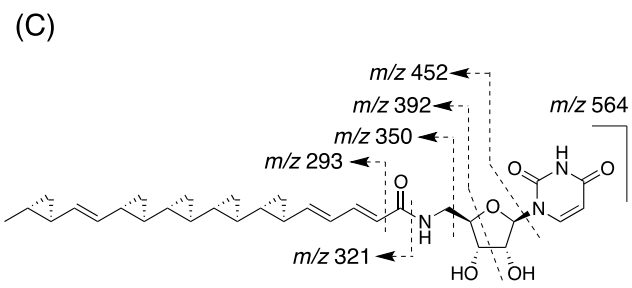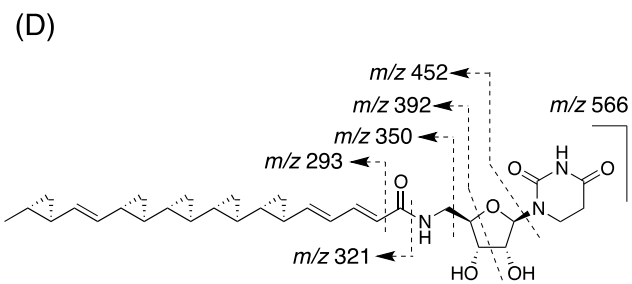

**Figure S3.** LC-HRMS and MS/MS analysis of (A)  $^{13}\text{C}$ -labeled **2**, (B)  $^{13}\text{C}$ -labeled  $\text{C}_{18}$ -CP<sub>4</sub> analogs, and (C)  $^{13}\text{C}$ -labeled  $\text{C}_{18}$ -CP<sub>3</sub> analogs, which were obtained from the feeding experiment with L-[Me- $^{13}\text{C}$ ]methionine. In this feeding experiment shown in Figure S3-S8, a major isotopomer was found to be a fully  $^{13}\text{C}$ -enriched sample (~50%) at a methylene carbon of the cyclopropane moiety. The carbon-13 labels are shown in the gray circles. An increased mass number of each fragmentation compared with that of non-labeled one is shown in parenthesis. (D) Summary of high resolution mass spectrometry of each compound.

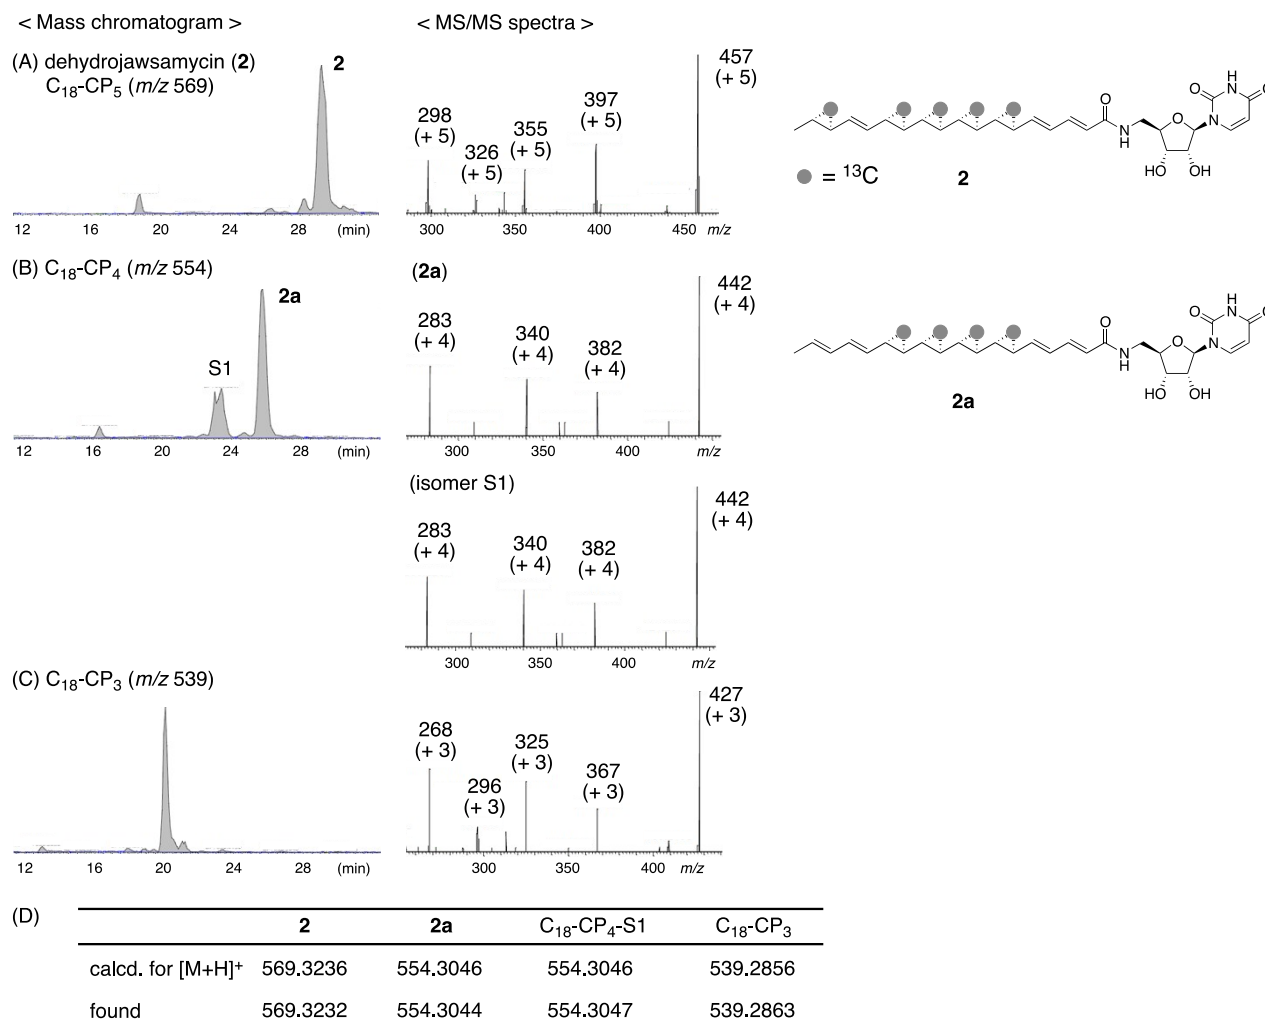

**Figure S4.** LC-HRMS and MS/MS analysis of (A)  $^{13}\text{C}$ -labeled **3**, (B)  $^{13}\text{C}$ -labeled **4** and **3a**, (C)  $^{13}\text{C}$ -labeled  $\text{C}_{16}$ -CP<sub>3</sub> analogs, and (D)  $^{13}\text{C}$ -labeled  $\text{C}_{16}$ -CP<sub>2</sub> analog, which were obtained from the feeding experiment with L-[Me- $^{13}\text{C}$ ]methionine. The carbon-13 labels are shown in the gray circles. An increased mass number of each fragmentation compared with that of non-labeled one is shown in parenthesis. (E) Summary of high resolution mass spectrometry of each compound.

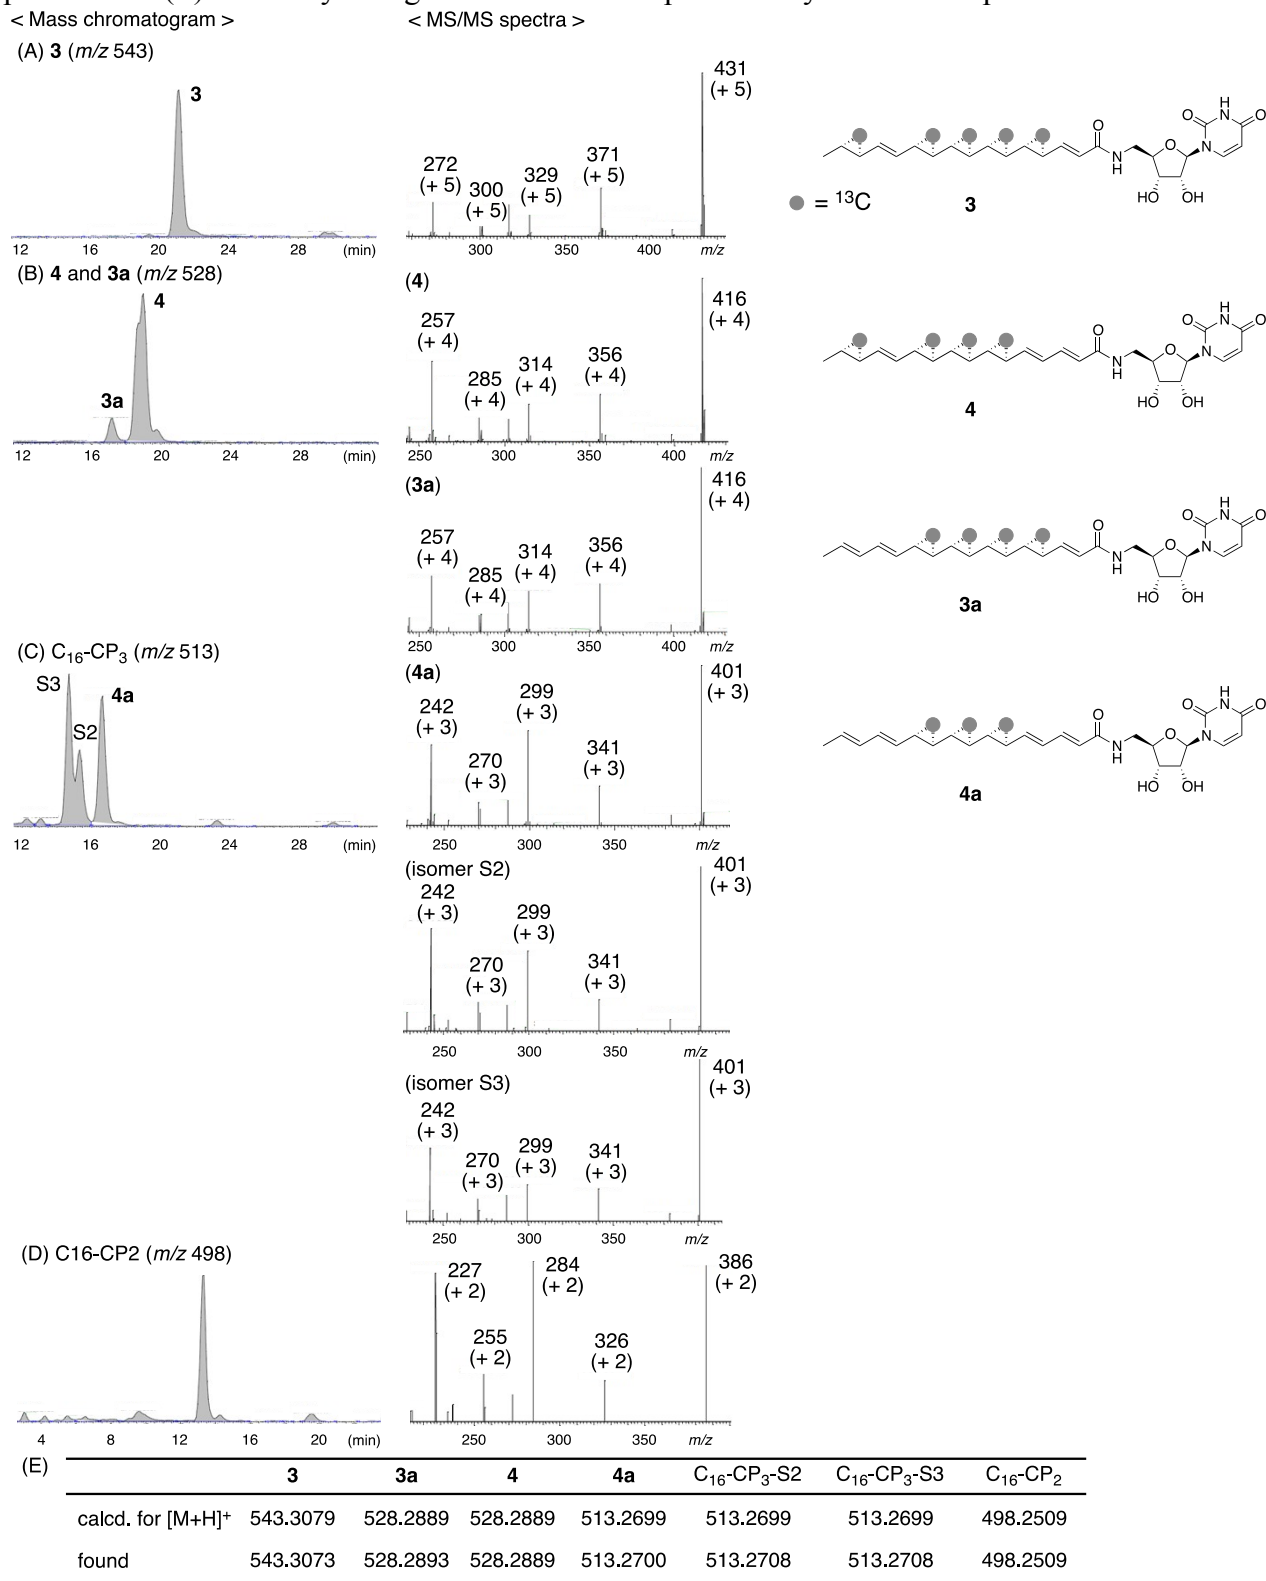

**Figure S5.** LC-HRMS and MS/MS analysis of (A)  $^{13}\text{C}$ -labeled  $\text{C}_{14}\text{-CP}_5$  analog, (B)  $^{13}\text{C}$ -labeled  $\text{C}_{14}\text{-CP}_4$  analog, (C)  $^{13}\text{C}$ -labeled  $\text{C}_{14}\text{-CP}_3$  analogs, (D)  $^{13}\text{C}$ -labeled  $\text{C}_{14}\text{-CP}_2$  analogs, and (E)  $^{13}\text{C}$ -labeled  $\text{C}_{14}\text{-CP}_1$  analog, which are obtained from the feeding experiment with L-[Me- $^{13}\text{C}$ ]methionine. An increased mass number of each fragmentation compared with that of non-labeled one is shown in parenthesis. (F) Summary of high resolution mass spectrometry of each compound.

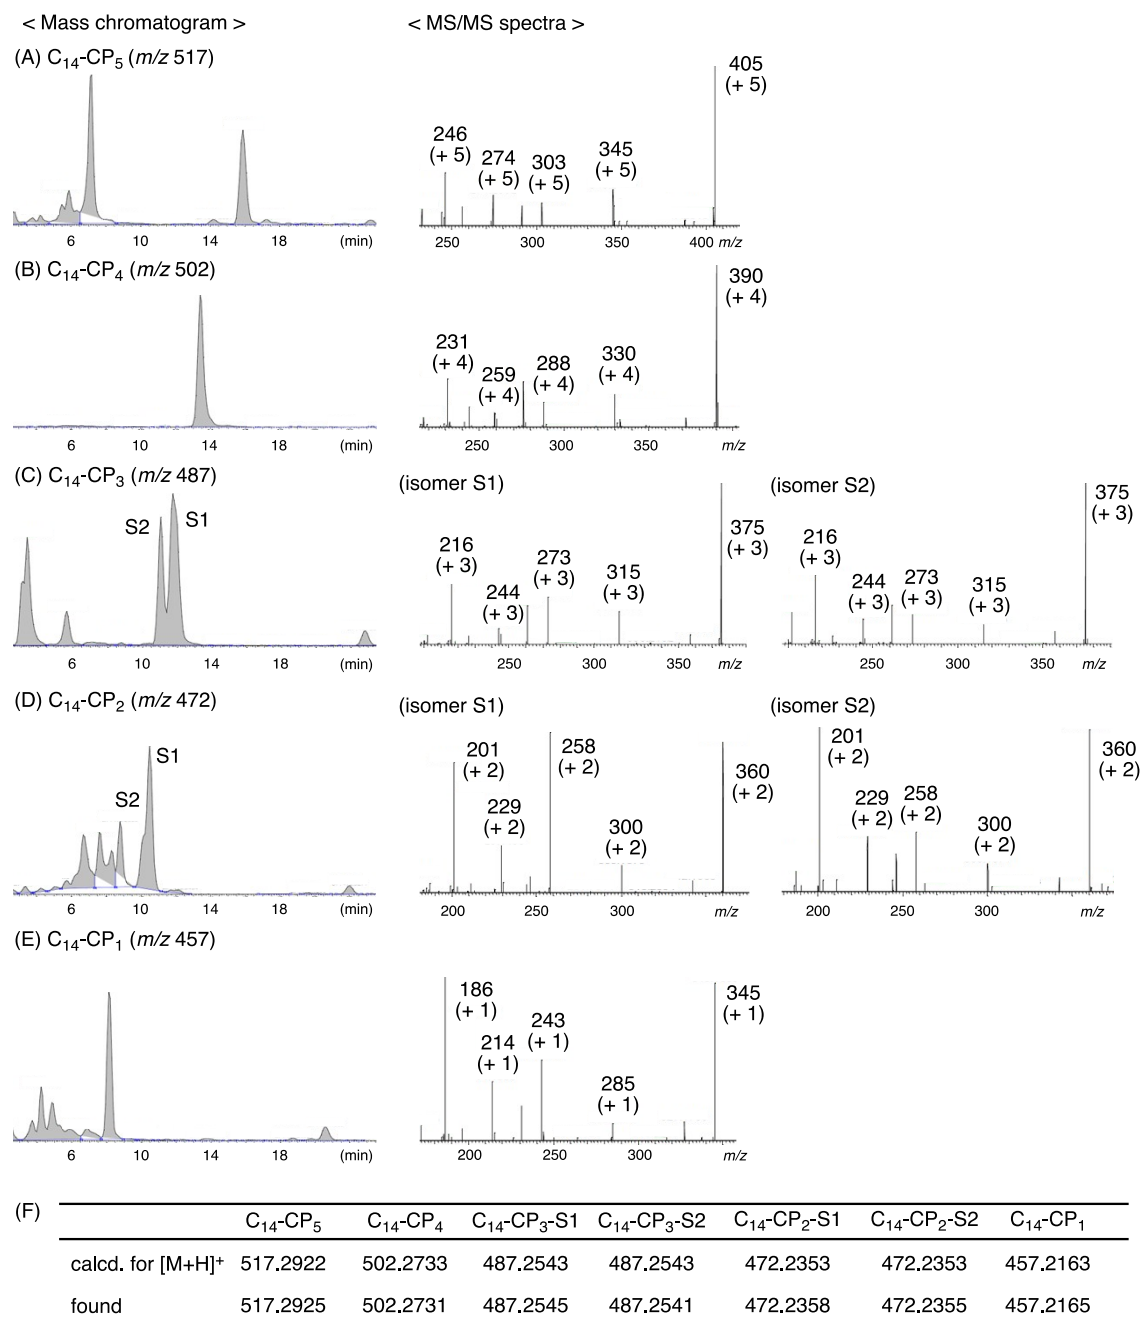



**Figure S6.** LC-HRMS and MS/MS analysis of (A)  $^{13}\text{C}$ -labeled  $\text{C}_{12}\text{-CP}_4$  analog, (B)  $^{13}\text{C}$ -labeled  $\text{C}_{12}\text{-CP}_3$  analog, (C)  $^{13}\text{C}$ -labeled  $\text{C}_{12}\text{-CP}_2$  analog, and (D)  $^{13}\text{C}$ -labeled  $\text{C}_{12}\text{-CP}_1$  analogs, which are obtained from the feeding experiment with L-[Me- $^{13}\text{C}$ ]methionine. An increased mass number of each fragmentation compared with that of non-labeled one is shown in parenthesis. (E) Summary of high resolution mass spectrometry of each compound.

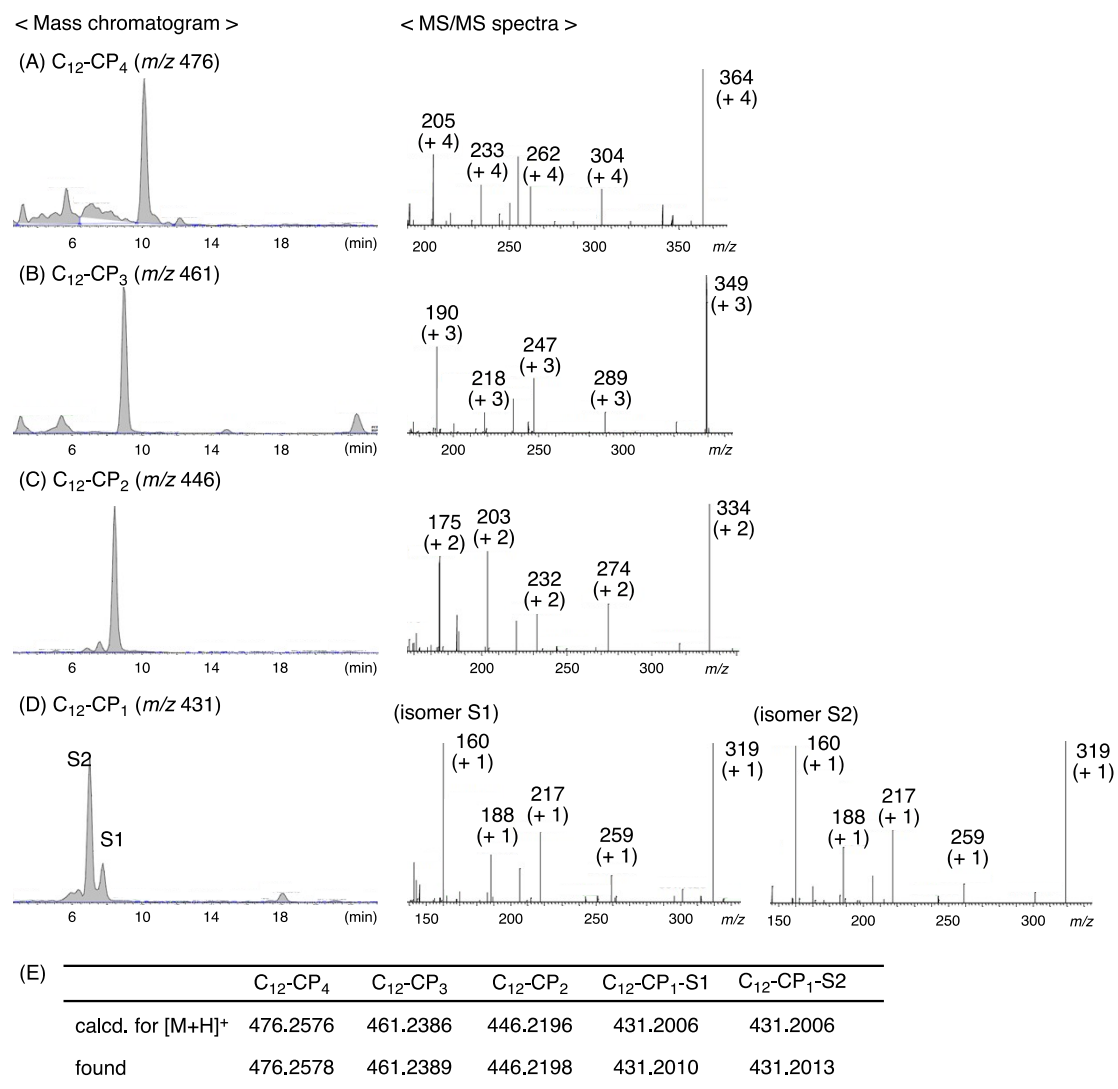

**Figure S7.** LC-HRMS and MS/MS analysis of (A)  $^{13}\text{C}$ -labeled  $\text{C}_{10}\text{-CP}_1$  analog, which are obtained from the feeding experiment with L-[Me- $^{13}\text{C}$ ]methionine. An increased mass number of each fragmentation compared with that of non-labeled one is shown in parenthesis. (B) Summary of high resolution mass spectrometry of each compound.

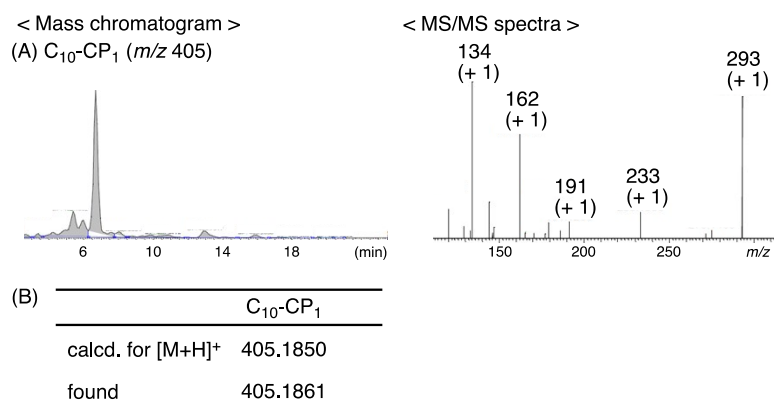

**Figure S8.** LC-HRMS and MS/MS analysis of (A)  $^{13}\text{C}$ -labeled  $\text{C}_8\text{-CP}_1$  analog and (B)  $^{13}\text{C}$ -labeled  $\text{C}_8\text{-CP}_0$  analog, which are obtained from the feeding experiment with L-[Me- $^{13}\text{C}$ ]methionine. An increased mass number of each fragmentation compared with that of non-labeled one is shown in parenthesis. (C) Summary of high resolution mass spectrometry of each compound.

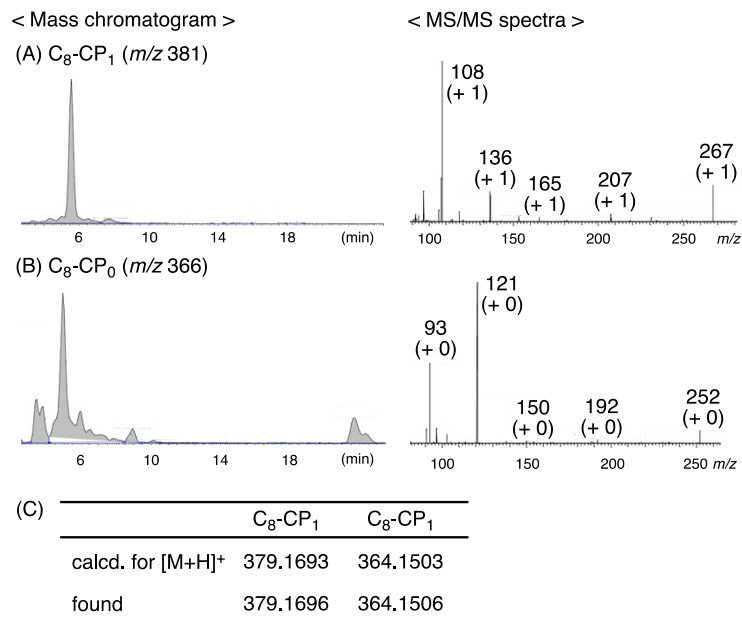

**Figure S9.** LC-HRMS and MS/MS analysis of (A)  $^{13}\text{C}$ -labeled **1**, (B)  $^{13}\text{C}$ -labeled  $\text{C}_{18}\text{-CP}_4$  analogs, and (C)  $^{13}\text{C}$ -labeled  $\text{C}_{18}\text{-CP}_3$  analog, which are obtained from the feeding experiment with L-[Me- $^{13}\text{C}$ ]methionine. In this feeding experiment shown in Figure S9-S13, a major isotopomer was found to be a fully  $^{13}\text{C}$ -enriched sample ( $\sim 50\%$ ) at a methylene carbon of the cyclopropane moiety. The carbon-13 labels are shown in the gray circles. An increased mass number of each fragmentation compared with that of non-labeled one is shown in parenthesis. (D) Summary of high resolution mass spectrometry of each compound.

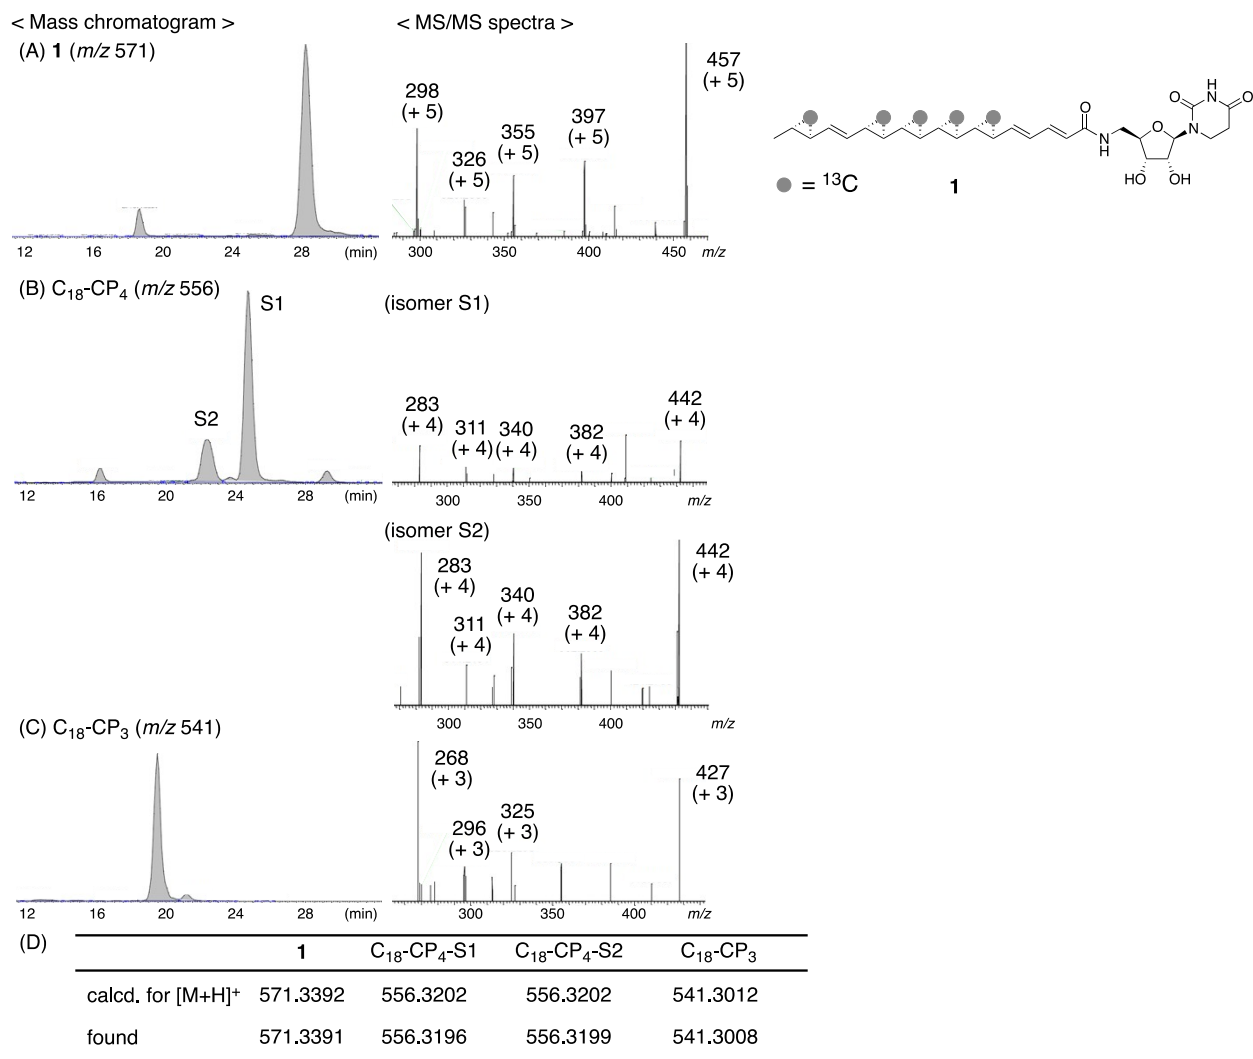

**Figure S10.** LC-HRMS and MS/MS analysis of (A)  $^{13}\text{C}$ -labeled  $\text{C}_{16}\text{-CP}_5$  analog, (B)  $^{13}\text{C}$ -labeled  $\text{C}_{16}\text{-CP}_4$  analogs, (C)  $^{13}\text{C}$ -labeled  $\text{C}_{16}\text{-CP}_3$  analogs, and (D)  $^{13}\text{C}$ -labeled  $\text{C}_{16}\text{-CP}_2$  analog, which are obtained from the feeding experiment with L-[Me- $^{13}\text{C}$ ]methionine. An increased mass number of each fragmentation compared with that of non-labeled one is shown in parenthesis. (E) Summary of high resolution mass spectrometry of each compound.

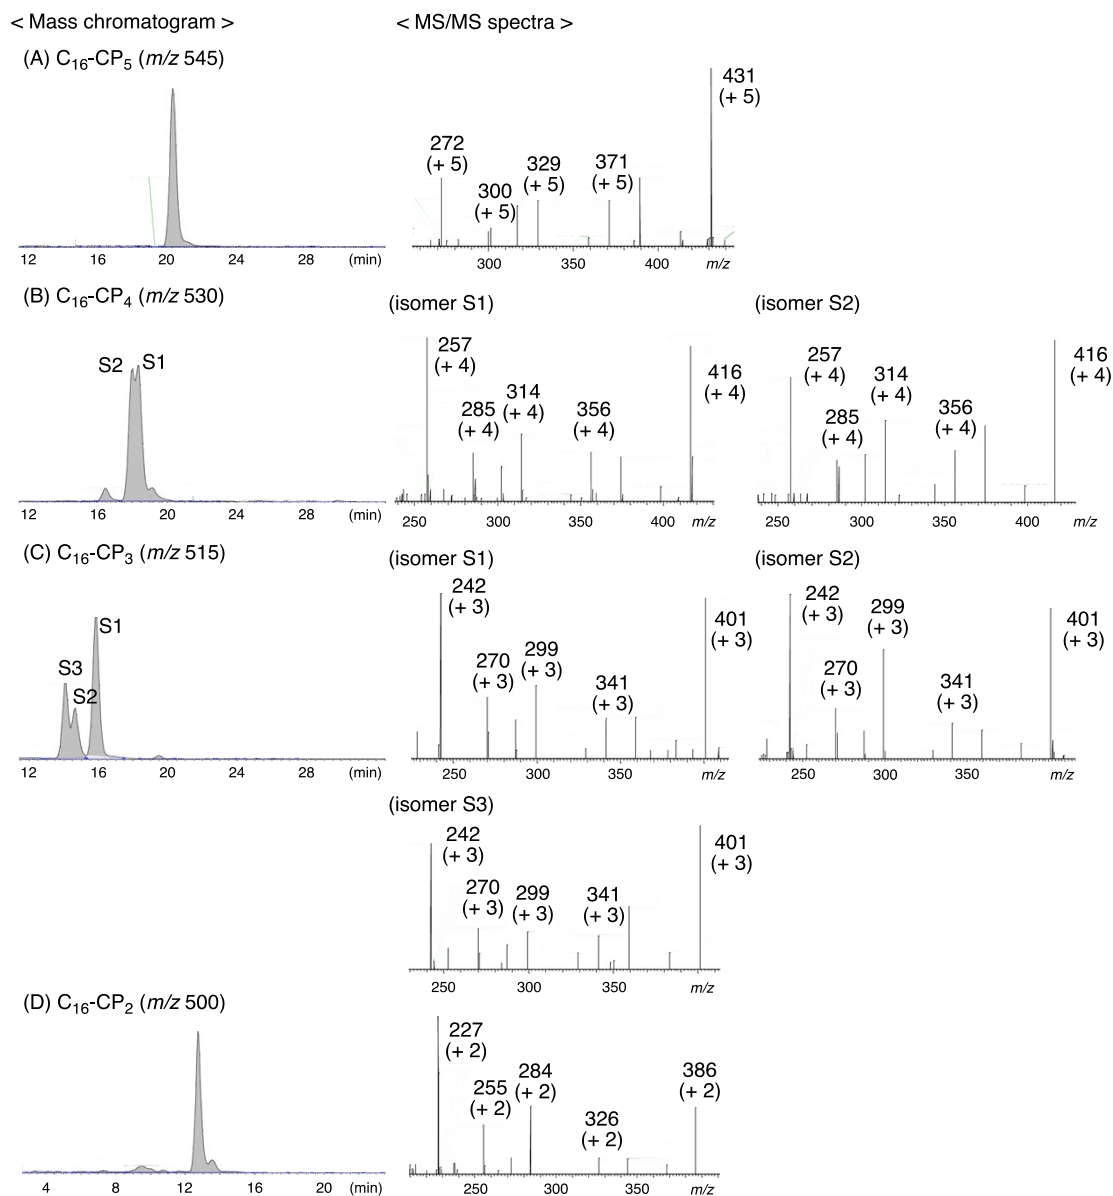

| (E)                                | $\text{C}_{16}\text{-CP}_5$ | $\text{C}_{16}\text{-CP}_4\text{-S1}$ | $\text{C}_{16}\text{-CP}_4\text{-S2}$ | $\text{C}_{16}\text{-CP}_3\text{-S1}$ | $\text{C}_{16}\text{-CP}_3\text{-S2}$ | $\text{C}_{16}\text{-CP}_3\text{-S3}$ | $\text{C}_{16}\text{-CP}_2$ |
|------------------------------------|-----------------------------|---------------------------------------|---------------------------------------|---------------------------------------|---------------------------------------|---------------------------------------|-----------------------------|
| calcd. for $[\text{M}+\text{H}]^+$ | 545.3236                    | 530.3046                              | 530.3046                              | 515.2856                              | 515.2856                              | 515.2856                              | 500.2666                    |
| found                              | 545.3223                    | 530.3033                              | 530.3036                              | 515.2848                              | 515.2852                              | 515.2856                              | 500.2665                    |

**Figure S11.** LC-HRMS and MS/MS analysis of (A)  $^{13}\text{C}$ -labeled  $\text{C}_{14}\text{-CP}_5$  analog, (B)  $^{13}\text{C}$ -labeled  $\text{C}_{14}\text{-CP}_4$  analog, (C)  $^{13}\text{C}$ -labeled  $\text{C}_{14}\text{-CP}_3$  analogs, (D)  $^{13}\text{C}$ -labeled  $\text{C}_{14}\text{-CP}_2$  analogs, and (E)  $^{13}\text{C}$ -labeled  $\text{C}_{14}\text{-CP}_1$  analog, which are obtained from the feeding experiment with L-[Me- $^{13}\text{C}$ ]methionine. An increased mass number of each fragmentation compared with that of non-labeled one is shown in parenthesis. (F) Summary of high resolution mass spectrometry of each compound.

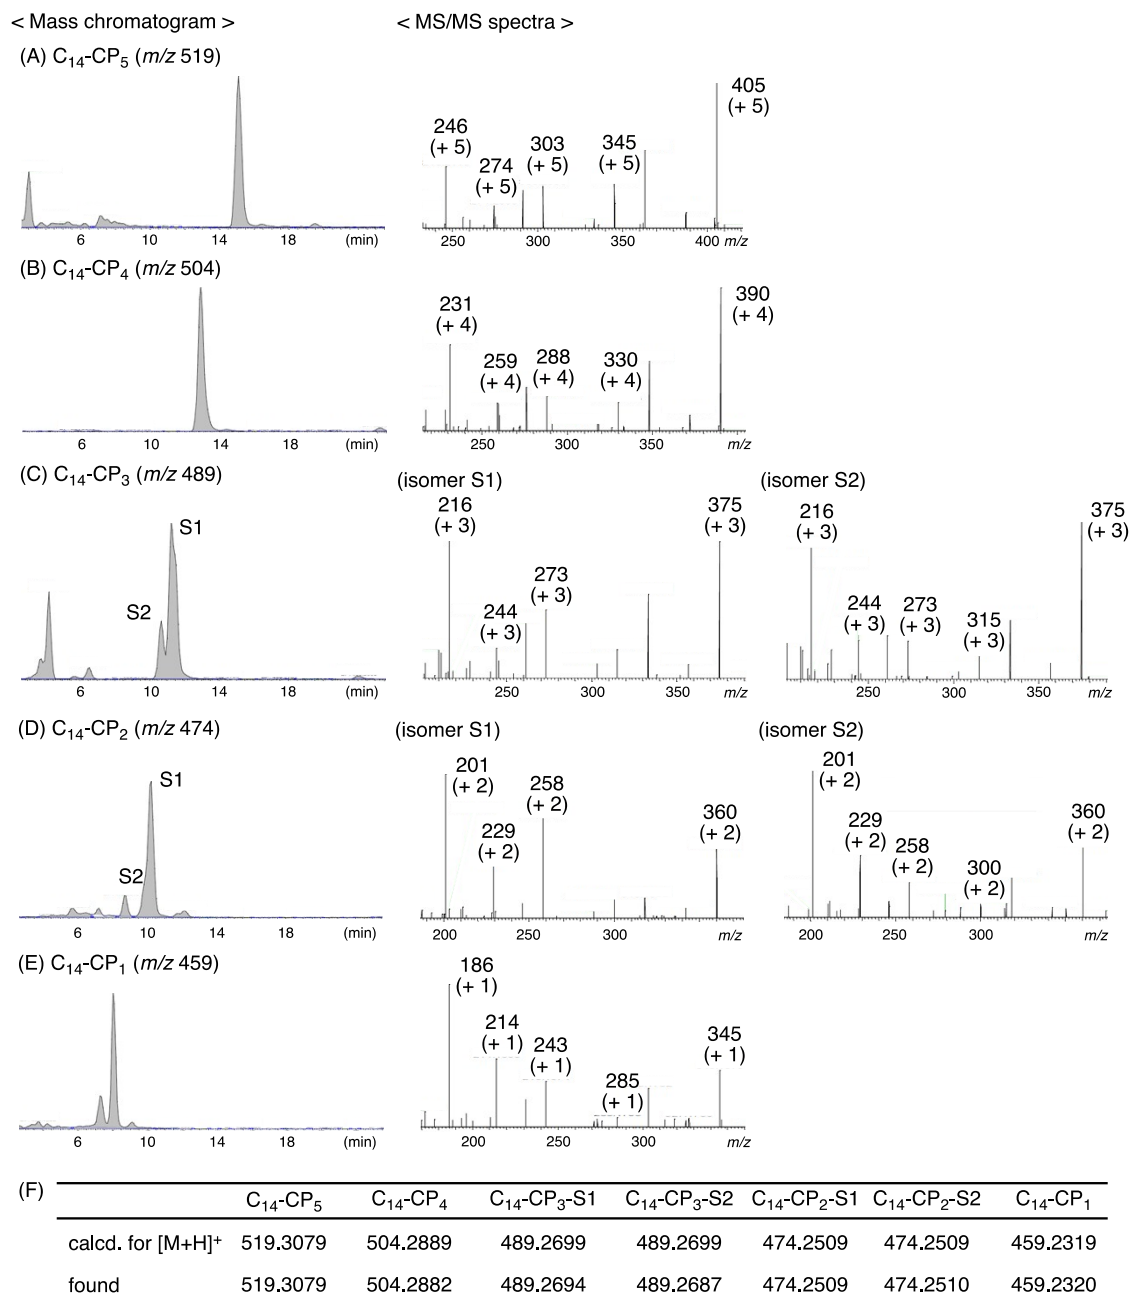

**Figure S12.** LC-HRMS and MS/MS analysis of (A)  $^{13}\text{C}$ -labeled  $\text{C}_{12}\text{-CP}_4$  analog, (B)  $^{13}\text{C}$ -labeled  $\text{C}_{12}\text{-CP}_3$  analog, (C)  $^{13}\text{C}$ -labeled  $\text{C}_{12}\text{-CP}_2$  analog, and (D)  $^{13}\text{C}$ -labeled  $\text{C}_{11}\text{-CP}_1$  analogs, which are obtained from the feeding experiment with L-[Me- $^{13}\text{C}$ ]methionine. An increased mass number of each fragmentation compared with that of non-labeled one is shown in parenthesis. (E) Summary of high resolution mass spectrometry of each compound.

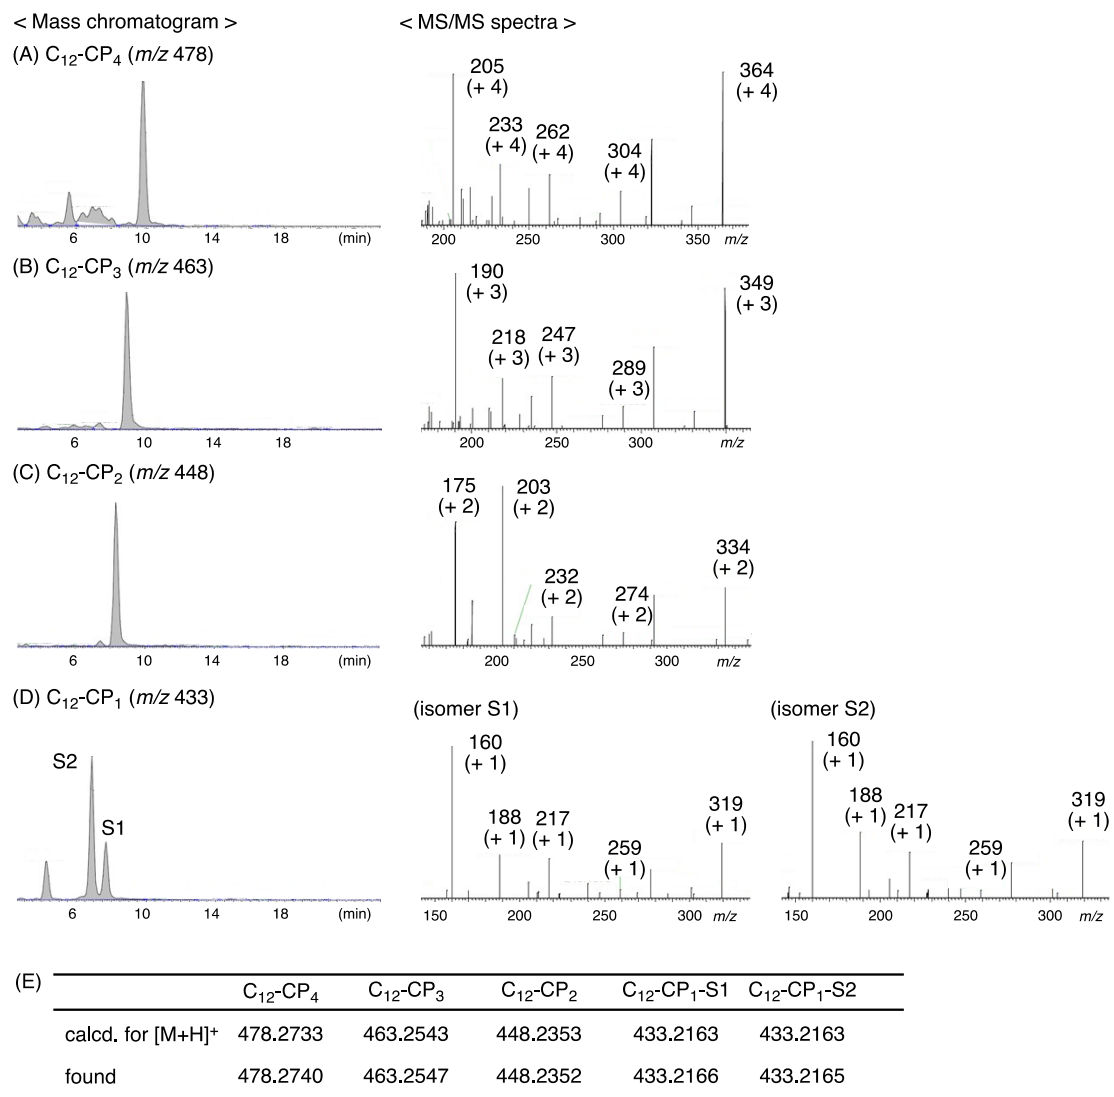

**Figure S13.** LC-HRMS and MS/MS analysis of (A)  $^{13}\text{C}$ -labeled  $\text{C}_8\text{-CP}_1$  analog, which are obtained from the feeding experiment with L-[Me- $^{13}\text{C}$ ]methionine. An increased mass number of each fragmentation compared with that of non-labeled one is shown in parenthesis. (B) Summary of high resolution mass spectrometry of each compound.

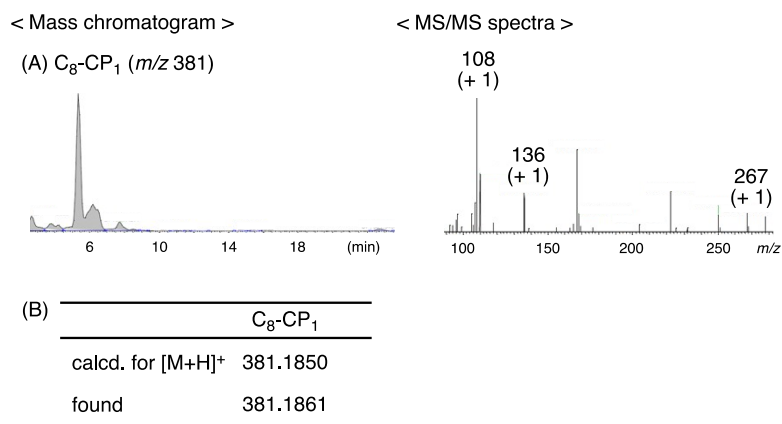



**Figure S14.** MS analysis of crude metabolites from jawsamycin producing *S. fervens* HP-891.

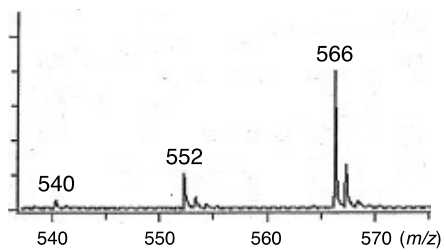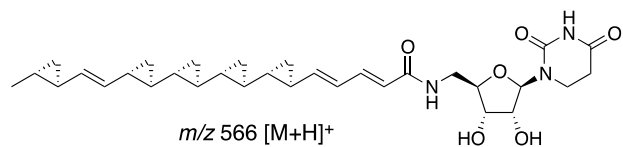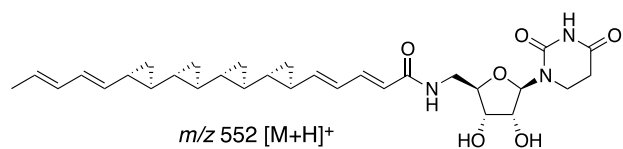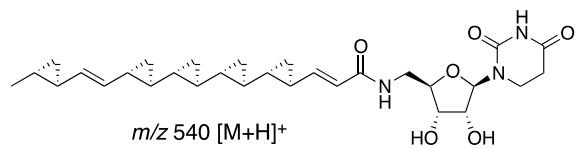

**Scheme S1.** Proposed biosynthetic pathway for **2a-4a** harboring terminal conjugated diene. The isolated analogs are labeled with asterisks. Numbering of the double bond is shown on upper part of the polyketide structure.

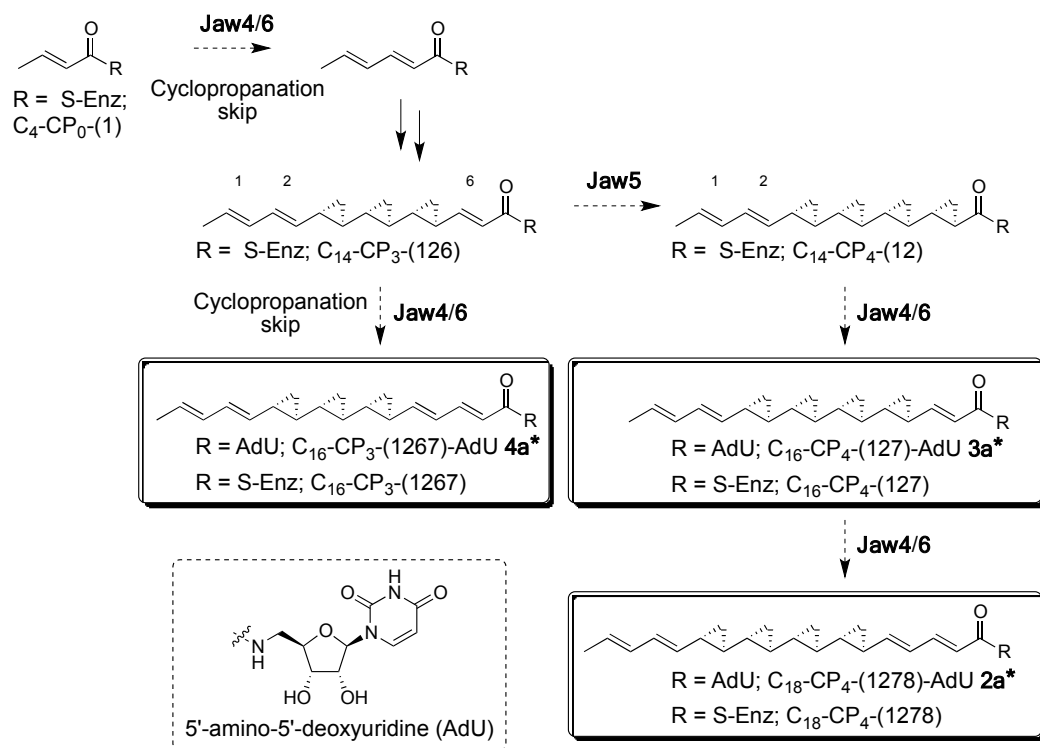

**Scheme S2.** Proposed biosynthetic pathway of U-106305.

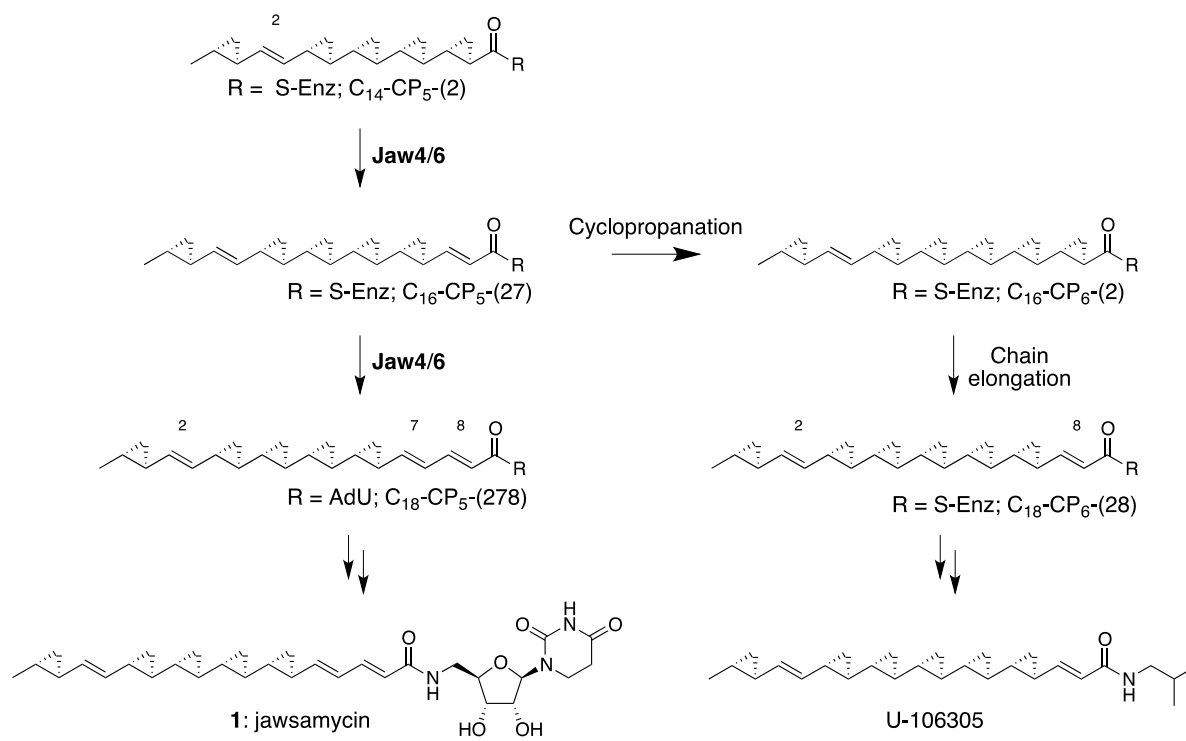

**Table S1.** Number of polyketide isomers of (A) **2** analogs and (B) **1** analogs. Compounds, which were not observed in the LC-HR-MS/MS analysis, are shown in horizontal bars (-). C<sub>10</sub>-CP<sub>5</sub>, C<sub>8</sub>-CP<sub>5</sub>, and C<sub>8</sub>-CP<sub>4</sub> are not biosynthetically available and the corresponding columns are shown in grey color.

(A)

|                 | CP <sub>5</sub> | CP <sub>4</sub> | CP <sub>3</sub> | CP <sub>2</sub> | CP <sub>1</sub> | CP <sub>0</sub> |
|-----------------|-----------------|-----------------|-----------------|-----------------|-----------------|-----------------|
| C <sub>18</sub> | 1               | 2               | 1               | -               | -               | -               |
| C <sub>16</sub> | 1               | 2               | 3               | 1               | -               | -               |
| C <sub>14</sub> | 1               | 1               | 2               | 2               | 1               | -               |
| C <sub>12</sub> | -               | 1               | 1               | 1               | 2               | -               |
| C <sub>10</sub> |                 |                 |                 |                 | 1               | -               |
| C <sub>8</sub>  |                 |                 |                 |                 | 1               | 1               |

(B)

|                 | CP <sub>5</sub> | CP <sub>4</sub> | CP <sub>3</sub> | CP <sub>2</sub> | CP <sub>1</sub> | CP <sub>0</sub> |
|-----------------|-----------------|-----------------|-----------------|-----------------|-----------------|-----------------|
| C <sub>18</sub> | 1               | 2               | 1               | -               | -               | -               |
| C <sub>16</sub> | 1               | 2               | 3               | 1               | -               | -               |
| C <sub>14</sub> | 1               | 1               | 2               | 2               | 1               | -               |
| C <sub>12</sub> | -               | 1               | 1               | 1               | 2               | -               |
| C <sub>10</sub> |                 |                 |                 |                 | -               | -               |
| C <sub>8</sub>  |                 |                 |                 |                 | 1               | -               |

**Table S2.** Hypothetical chain elongation process. Polyketides with methyl-terminal cyclopropane are shown in red bond. Instead, those with methyl-terminal conjugated diene are shown in blue bond. Polyketide precursors of the isolated analogs are highlighted by light green color. Early stage branch point, C<sub>4</sub>-CP<sub>0</sub>-(1), is highlighted by yellow color. Putative side products constructed by an unexpected cyclopropanation skip are shown in square brackets but other possibilities cannot be excluded.

|                 | CP <sub>5</sub>                             | CP <sub>4</sub>                                                                              | CP <sub>3</sub>                                                                              | CP <sub>2</sub>                                                                              | CP <sub>1</sub>                                                                            | CP <sub>0</sub>                            |
|-----------------|---------------------------------------------|----------------------------------------------------------------------------------------------|----------------------------------------------------------------------------------------------|----------------------------------------------------------------------------------------------|--------------------------------------------------------------------------------------------|--------------------------------------------|
| C <sub>18</sub> | <br>C <sub>18</sub> -CP <sub>5</sub> -(278) | <br>C <sub>18</sub> -CP <sub>4</sub> -(2678)<br><br>C <sub>18</sub> -CP <sub>4</sub> -(1278) | <br>C <sub>18</sub> -CP <sub>3</sub> -(12678)                                                |                                                                                              |                                                                                            |                                            |
| C <sub>16</sub> | <br>C <sub>16</sub> -CP <sub>5</sub> -(27)  | <br>C <sub>16</sub> -CP <sub>4</sub> -(267)<br><br>C <sub>16</sub> -CP <sub>4</sub> -(127)   | <br>C <sub>16</sub> -CP <sub>3</sub> -(2567)<br><br>C <sub>16</sub> -CP <sub>3</sub> -(1267) | <br>C <sub>16</sub> -CP <sub>2</sub> -(12567)                                                |                                                                                            |                                            |
| C <sub>14</sub> | <br>C <sub>14</sub> -CP <sub>5</sub> -(2)   | <br>C <sub>14</sub> -CP <sub>4</sub> -(26)<br><br>C <sub>14</sub> -CP <sub>4</sub> -(12)     | <br>C <sub>14</sub> -CP <sub>3</sub> -(256)<br><br>C <sub>14</sub> -CP <sub>3</sub> -(126)   | <br>C <sub>14</sub> -CP <sub>2</sub> -(2456)<br><br>C <sub>14</sub> -CP <sub>2</sub> -(1256) | <br>C <sub>14</sub> -CP <sub>1</sub> -(12456)                                              |                                            |
| C <sub>12</sub> |                                             | <br>C <sub>12</sub> -CP <sub>4</sub> -(2)                                                    | <br>C <sub>12</sub> -CP <sub>3</sub> -(25)<br><br>C <sub>12</sub> -CP <sub>3</sub> -(12)     | <br>C <sub>12</sub> -CP <sub>2</sub> -(245)<br><br>C <sub>12</sub> -CP <sub>2</sub> -(125)   | <br>C <sub>12</sub> -CP <sub>1</sub> -(1245)                                               |                                            |
| C <sub>10</sub> |                                             |                                                                                              | <br>C <sub>10</sub> -CP <sub>3</sub> -(2)                                                    | <br>C <sub>10</sub> -CP <sub>2</sub> -(24)<br><br>C <sub>10</sub> -CP <sub>2</sub> -(12)     | <br>C <sub>10</sub> -CP <sub>1</sub> -(234)<br><br>C <sub>10</sub> -CP <sub>1</sub> -(124) |                                            |
| C <sub>8</sub>  |                                             |                                                                                              |                                                                                              | <br>C <sub>8</sub> -CP <sub>2</sub> -(2)                                                     | <br>C <sub>8</sub> -CP <sub>1</sub> -(23)<br><br>C <sub>8</sub> -CP <sub>1</sub> -(12)     | <br>C <sub>8</sub> -CP <sub>0</sub> -(123) |
| C <sub>6</sub>  |                                             |                                                                                              |                                                                                              | <br>C <sub>6</sub> -CP <sub>1</sub> -(2)                                                     |                                                                                            | <br>C <sub>6</sub> -CP <sub>0</sub> -(12)  |
| C <sub>4</sub>  |                                             |                                                                                              |                                                                                              | <br>C <sub>4</sub> -CP <sub>1</sub>                                                          |                                                                                            | <br>C <sub>4</sub> -CP <sub>0</sub> -(1)   |

**Table S3.** NMR spectral data of dehydrojawsamycin analogs.

|       | Dehydrojawsamycin ( <b>2</b> ) |                          | C <sub>18</sub> -CP <sub>4</sub> -(1278)-AdU ( <b>2a</b> ) |                          | C <sub>16</sub> -CP <sub>5</sub> -(27)-AdU ( <b>3</b> ) |                         |
|-------|--------------------------------|--------------------------|------------------------------------------------------------|--------------------------|---------------------------------------------------------|-------------------------|
|       | $\delta_C$                     | $\delta_H$               | $\delta_C$                                                 | $\delta_H$               | $\delta_C$                                              | $\delta_H$              |
| 1     | 165.76                         |                          | 165.80                                                     |                          | 165.47                                                  |                         |
| 2     | 121.39                         | 5.89 (d, 15.0 Hz)        | 121.40                                                     | 5.87 (d, 15.0 Hz)        | 120.87                                                  | 5.92 (d, 15.2 Hz)       |
| 3     | 139.59                         | 6.95 (dd, 15.0, 11.2 Hz) | 139.62                                                     | 6.93 (dd, 15.0, 11.3 Hz) | 147.21                                                  | 6.13 (dd, 15.2, 9.9 Hz) |
| 4     | 125.49                         | 6.21 (dd, 15.0, 10.7 Hz) | 125.50                                                     | 6.10 (dd, 15.0, 11.3 Hz) | 20.28                                                   | 1.21-1.28 (m)           |
| 5     | 145.82                         | 5.66 (dd, 10.7, 4.6 Hz)  | 145.89                                                     | 5.63 (dd, 15.0, 9.7 Hz)  | 23.55                                                   | 0.95-1.00 (m)           |
| 6     | 21.03                          | 1.22-1.31 (m)            | 21.06                                                      | 1.21-1.27 (m)            | 17.73                                                   | 0.49-0.55 (m)           |
| 7     | 23.32                          | 0.95-1.02 (m)            | 23.34                                                      | 0.93-1.00 (m)            | 18.13                                                   | 0.50-0.56 (m)           |
| 8     | 17.68                          | 0.55-0.61 (m)            | 17.80                                                      | 0.58-0.60 (m)            | 18.47                                                   | 0.56-0.60 (m)           |
| 9     | 18.04                          | 0.54-0.60 (m)            | 18.32                                                      | 0.50-0.54 (m)            | 17.94                                                   | 0.48-0.53 (m)           |
| 10    | 18.32                          | 0.56-0.64 (m)            | 18.15                                                      | 0.54-0.59 (m)            | 21.36                                                   | 0.68-0.73 (m)           |
| 11    | 17.83                          | 0.48-0.54 (m)            | 17.71                                                      | 0.52-0.57 (m)            | 19.78                                                   | 0.95-1.00 (m)           |
| 12    | 21.27                          | 0.70-0.76 (m)            | 22.22                                                      | 0.77-0.85 (m)            | 130.39                                                  | 4.96 (dd, 5.3, 2.7 Hz)  |
| 13    | 19.68                          | 0.96-1.05 (m)            | 20.11                                                      | 1.05-1.12 (m)            | 130.76                                                  | 4.96 (dd, 5.3, 2.7 Hz)  |
| 14    | 130.28                         | 4.97 (dd, 5.1, 2.5 Hz)   | 135.00                                                     | 5.10 (dd, 14.5, 9.0 Hz)  | 22.12                                                   | 0.92-0.98 (m)           |
| 15    | 130.63                         | 4.97 (dd, 5.1, 2.5 Hz)   | 127.49                                                     | 5.92-6.01 (m)            | 14.20                                                   | 0.60-0.64 (m)           |
| 16    | 22.02                          | 0.95-1.02 (m)            | 131.54                                                     | 5.88-5.95 (m)            | 18.41                                                   | 0.98 (d, 6.0 Hz)        |
| 17    | 14.10                          | 0.63-0.69 (m)            | 125.33                                                     | 5.44-5.52 (m)            | 13.10                                                   | 0.57-0.64 (m)           |
| 18    | 18.32                          | 1.00 (d, 6.0 Hz)         | 17.80                                                      | 1.66 (d, 6.7 Hz)         | 7.81                                                    | 0.02-0.07 (m)           |
| 19    | 12.99                          | 0.52-0.64 (m)            | 13.01                                                      | 0.51-0.61 (m)            | 7.81                                                    | 0.02-0.08 (m)           |
| 20    | 7.64                           | 0.03-0.10 (m)            | 7.67                                                       | 0.03-0.09 (m)            | 11.30                                                   | 0.27-0.34 (m)           |
| 21    | 7.68                           | 0.03-0.10 (m)            | 7.70                                                       | 0.03-0.09 (m)            | 14.49                                                   | 0.30-0.36 (m)           |
| 22    | 11.19                          | 0.30-0.37 (m)            | 12.04                                                      | 0.38-0.46 (m)            |                                                         | 0.42 (dt, 8.4, 4.3 Hz)  |
| 23    | 14.39                          | 0.32-0.38 (m)            |                                                            |                          |                                                         |                         |
| 2'    | 150.74                         |                          | 151.19                                                     |                          | 150.92                                                  |                         |
| 4'    | 163.05                         |                          | 163.71                                                     |                          | 163.34                                                  |                         |
| 5'    | 101.93                         | 5.62 (d, 8.0 Hz)         | 101.99                                                     | 5.53 (d, 8.0 Hz)         | 102.05                                                  | 5.59 (d, 8.0 Hz)        |
| 6'    | 141.30                         | 7.67 (d, 8.0 Hz)         | 141.21                                                     | 7.56 (br. d 6.2 Hz)      | 141.37                                                  | 7.67 (d, 8.0 Hz)        |
| 1''   | 88.23                          | 5.73 (d, 5.1 Hz)         | 88.40                                                      | 5.68 (d, 5.2 Hz)         | 88.35                                                   | 5.71 (d, 5.1 Hz)        |
| 2''   | 72.42                          | 4.06 (t, 5.1 Hz)         | 72.45                                                      | 4.04 (t, 5.2 Hz)         | 72.51                                                   | 4.04 (t, 5.1 Hz)        |
| 3''   | 70.85                          | 3.86 (t, 5.1 Hz)         | 70.88                                                      | 3.84 (t, 5.2 Hz)         | 70.93                                                   | 3.84 (t, 5.1 Hz)        |
| 4''   | 82.63                          | 3.81 (dt, 6.0, 5.1 Hz)   | 82.58                                                      | 3.78 (dt, 6.0, 5.2 Hz)   | 82.72                                                   | 3.78 (dt, 6.4, 5.1 Hz)  |
| 5''   | 40.94                          | 3.48 (dt, 13.8, 5.1 Hz)  | 40.97                                                      | 3.45 (dt, 14.0, 5.2 Hz)  | 40.90                                                   | 3.45 (dt, 13.9, 5.1 Hz) |
| 2''OH |                                | 5.45 (br. s)             |                                                            | br                       |                                                         | 5.42 (br. s)            |
| 3''OH |                                | 5.25 (br. s)             |                                                            | br                       |                                                         | 5.21 (br. s)            |
| NH    |                                | 8.11 (t, 5.1 Hz)         |                                                            | 8.14 (t, 5.2 Hz)         |                                                         | 7.98 (t, 5.9 Hz)        |

**Table S3.** Continued.

|       | C <sub>16</sub> -CP <sub>4</sub> -(127)-AdU ( <b>3a</b> )<br>δ <sub>H</sub> | C <sub>16</sub> -CP <sub>4</sub> -(267)-AdU ( <b>4</b> )<br>δ <sub>H</sub> | C <sub>16</sub> -CP <sub>3</sub> -(1267)-AdU ( <b>4a</b> )<br>δ <sub>H</sub> |
|-------|-----------------------------------------------------------------------------|----------------------------------------------------------------------------|------------------------------------------------------------------------------|
| 1     |                                                                             |                                                                            |                                                                              |
| 2     | 5.93 (d, 15.2 Hz)                                                           | 5.88 (d, 15.1 Hz)                                                          | 5.88 (d, 14.9 Hz)                                                            |
| 3     | 6.13 (dd, 15.2, 10.0 Hz)                                                    | 6.94 (dd, 15.1, 11.3 Hz)                                                   | 6.95 (dd, 14.9, 11.1 Hz)                                                     |
| 4     | 1.21-1.29 (m)                                                               | 6.21 (dd, 15.1, 11.3 Hz)                                                   | 6.21 (dd, 14.9, 11.1 Hz)                                                     |
| 5     | 0.95-1.00 (m)                                                               | 5.65 (dd, 15.1, 9.5 Hz)                                                    | 5.65 (dd, 14.9, 9.5 Hz)                                                      |
| 6     | 0.49-0.73 (m)                                                               | 1.23-1.32 (m)                                                              | 1.23-1.30 (m)                                                                |
| 7     | 0.49-0.73 (m)                                                               | 0.50-0.67 (m)                                                              | 0.50-0.68 (m)                                                                |
| 8     | 0.49-0.73 (m)                                                               | 0.50-0.67 (m)                                                              | 0.50-0.68 (m)                                                                |
| 9     | 0.49-0.73 (m)                                                               | 0.50-0.67 (m)                                                              | 0.50-0.68 (m)                                                                |
| 10    | 0.49-0.73 (m)                                                               | 0.50-0.67 (m)                                                              | 0.50-0.68 (m)                                                                |
| 11    | 0.95-1.00 (m)                                                               | 0.92-1.02 (m)                                                              | 0.90-0.95 (m)                                                                |
| 12    | 5.10 (dd, 14.5, 9.3 Hz)                                                     | 4.97 (dd, 5.3, 2.7 Hz)                                                     | 5.11 (dd, 14.6, 9.0 Hz)                                                      |
| 13    | 5.94-6.03 (m)                                                               | 4.97 (dd, 5.3, 2.7 Hz)                                                     | 5.95-6.04 (m)                                                                |
| 14    | 5.87-5.96 (m)                                                               | 0.92-1.02 (m)                                                              | 5.87-5.96 (m)                                                                |
| 15    | 5.49 (dd, 14.5, 7.3 Hz)                                                     | 0.50-0.67 (m)                                                              | 5.49 (dd, 14.6, 6.9 Hz)                                                      |
| 16    | 1.67 (d, 6.6 Hz)                                                            | 0.99 (d, 5.9 Hz)                                                           | 1.67 (d, 6.9 Hz)                                                             |
| 17    | 0.57-0.64 (m)                                                               | 0.50-0.71 (m)                                                              | 0.50-0.68 (m)                                                                |
| 18    | 0.02-0.11 (m)                                                               | 0.03-0.09 (m)                                                              | 0.03-0.08 (m)                                                                |
| 19    | 0.02-0.11 (m)                                                               | 0.30-0.46 (m)                                                              | 0.41-0.48 (m)                                                                |
| 20    | 0.27-0.34 (m)                                                               | 0.30-0.46 (m)                                                              |                                                                              |
| 21    |                                                                             |                                                                            |                                                                              |
| 22    |                                                                             |                                                                            |                                                                              |
| 23    |                                                                             |                                                                            |                                                                              |
| 2'    |                                                                             |                                                                            |                                                                              |
| 4'    |                                                                             |                                                                            |                                                                              |
| 5'    | 5.58 (br. s)                                                                | 5.60 (d, 8.1 Hz)                                                           | 5.61 (d, 8.1 Hz)                                                             |
| 6'    | 7.63 (br. s)                                                                | 7.66 (d, 8.1 Hz)                                                           | 7.67 (d, 8.1 Hz)                                                             |
| 1''   | 5.70 (d, 5.1 Hz)                                                            | 5.72 (d, 5.1 Hz)                                                           | 5.72 (d, 5.1 Hz)                                                             |
| 2''   | 4.04 (t, 5.1 Hz)                                                            | 4.04 (t, 5.1 Hz)                                                           | 4.05 (t, 5.1 Hz)                                                             |
| 3''   | 3.83 (t, 5.1 Hz)                                                            | 3.84 (t, 5.1 Hz)                                                           | 3.85 (t, 5.1 Hz)                                                             |
| 4''   | 3.78 (dt, 6.0, 5.1 Hz)                                                      | 3.80 (dt, 6.5, 5.1 Hz)                                                     | 3.80 (dt, 6.3, 5.1 Hz)                                                       |
| 5''   | 3.41-3.48 (m)                                                               | 3.47 (dt, 13.6, 5.1 Hz)                                                    | 3.47 (dt, 13.8, 5.1 Hz)                                                      |
|       | 3.23-3.29 (m)                                                               | 3.21-3.37 (m)                                                              | 3.24-3.32 (m)                                                                |
| 2''OH | 5.40 (br. s)                                                                | 5.42 (br. s)                                                               | 5.41 (br. s)                                                                 |
| 3''OH | 5.18 (br. s)                                                                | 5.21 (br. s)                                                               | 5.19 (br. s)                                                                 |
| NH    | 7.99 (br. s)                                                                | 8.11 (t, 6.0 Hz)                                                           | 8.11 (t, 5.8 Hz)                                                             |

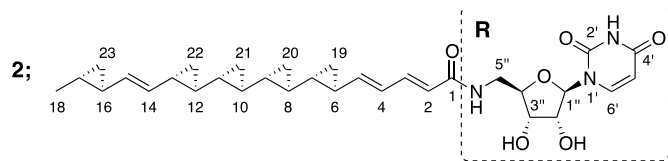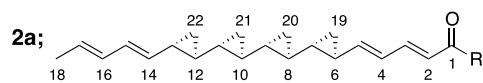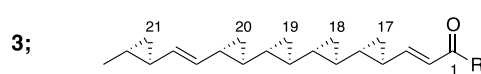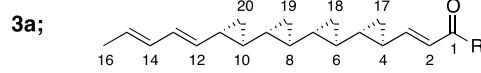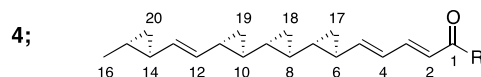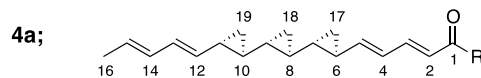

<sup>1</sup>H-NMR spectrum of 2a

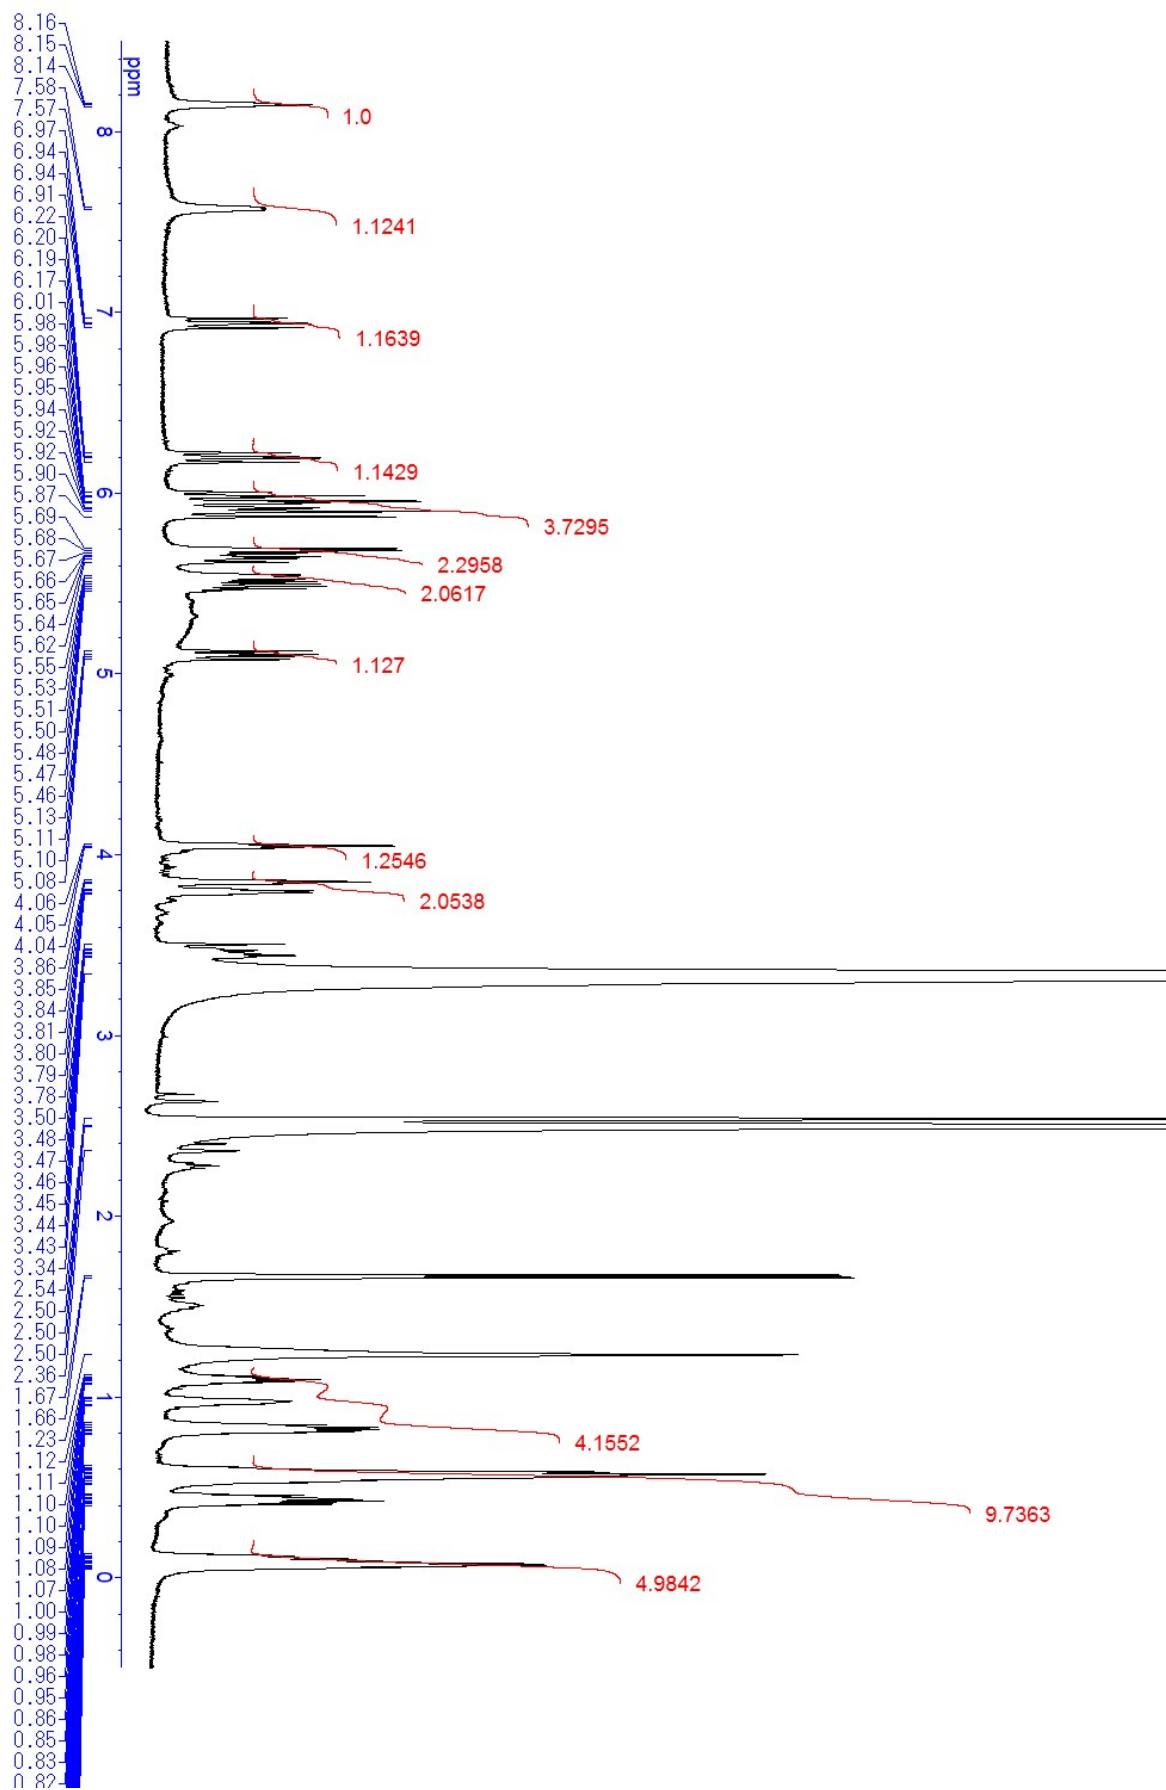



<sup>13</sup>C-NMR spectrum of 2a

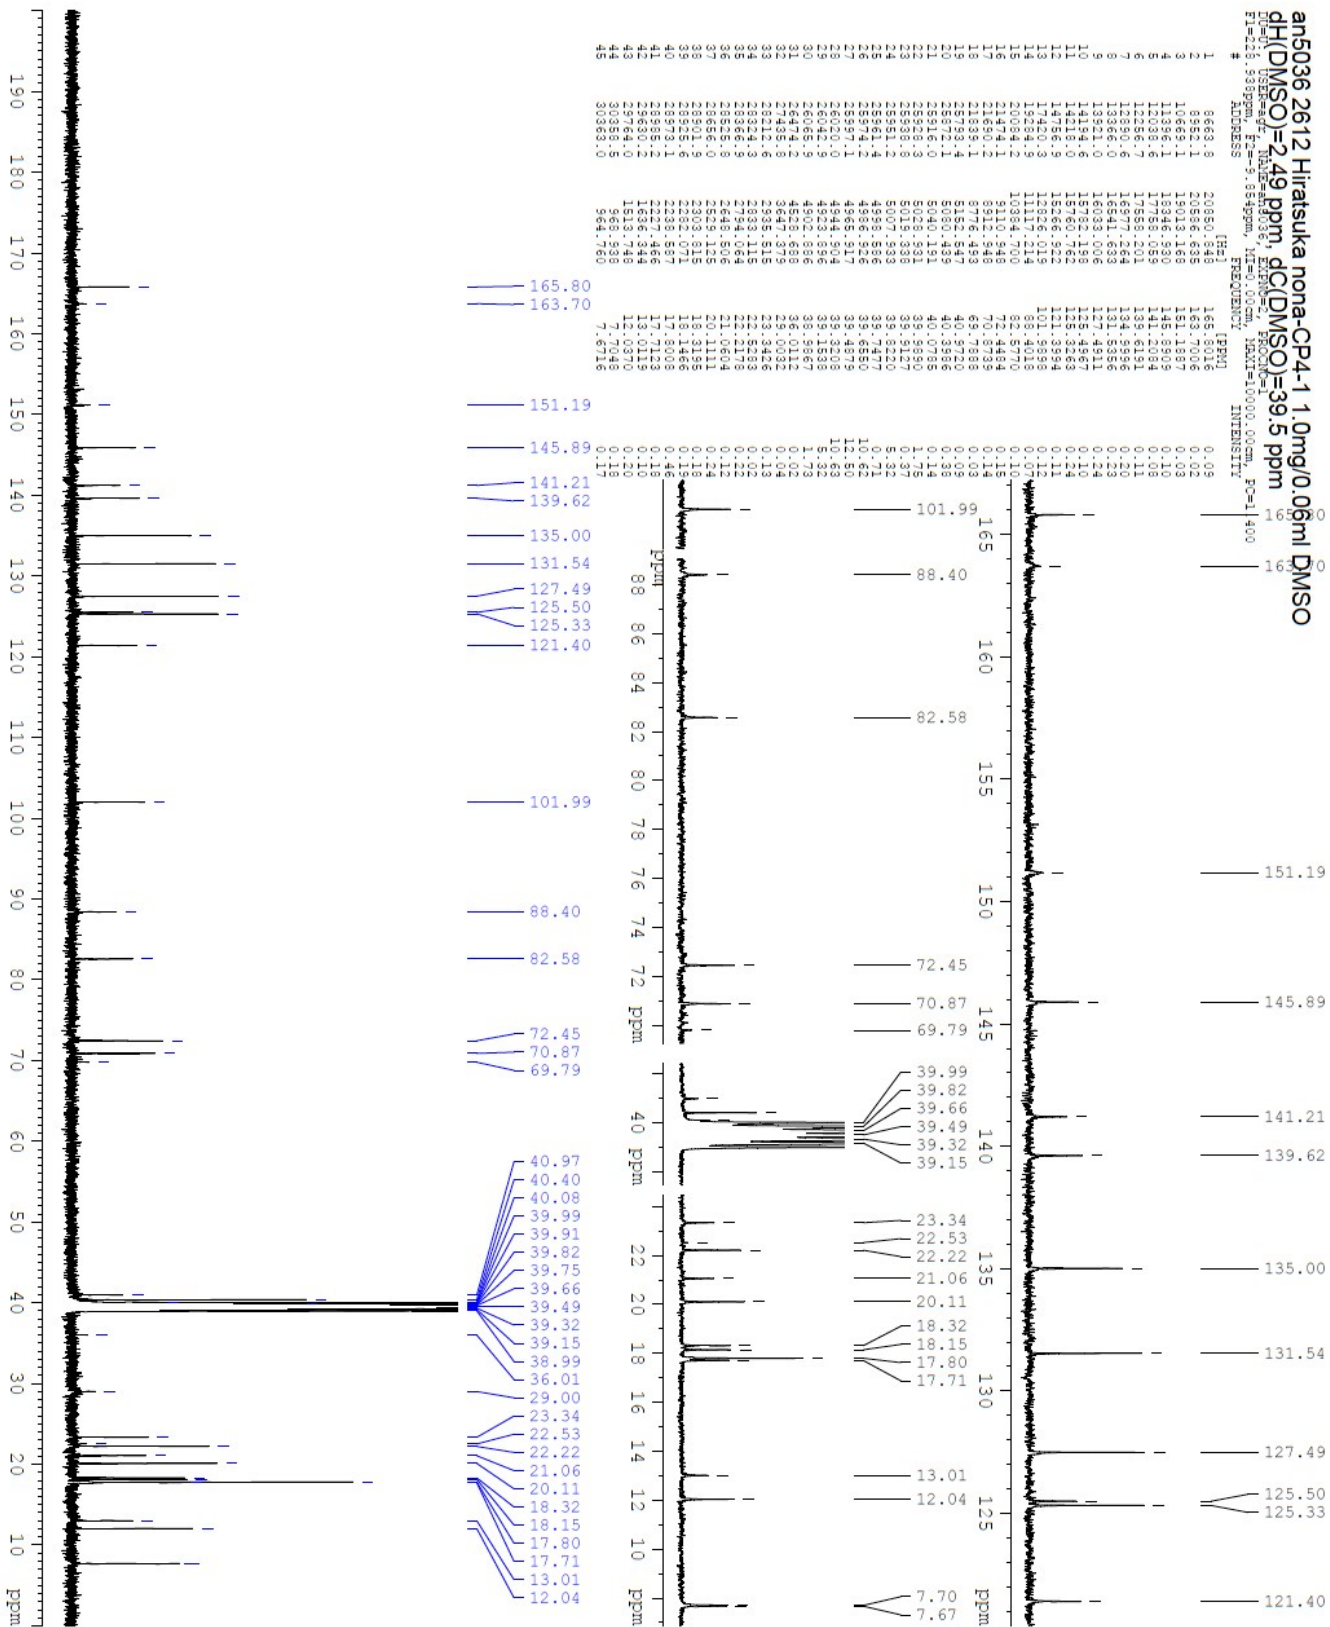

HSQC spectrum of **2a**

HSQC  
ans036-2612 Hiratsuka nona-CP4-1.1.0mg/0.06ml DMSO  
dH(DMSO)=-2.49 ppm, dC(DMSO)=39.5 ppm

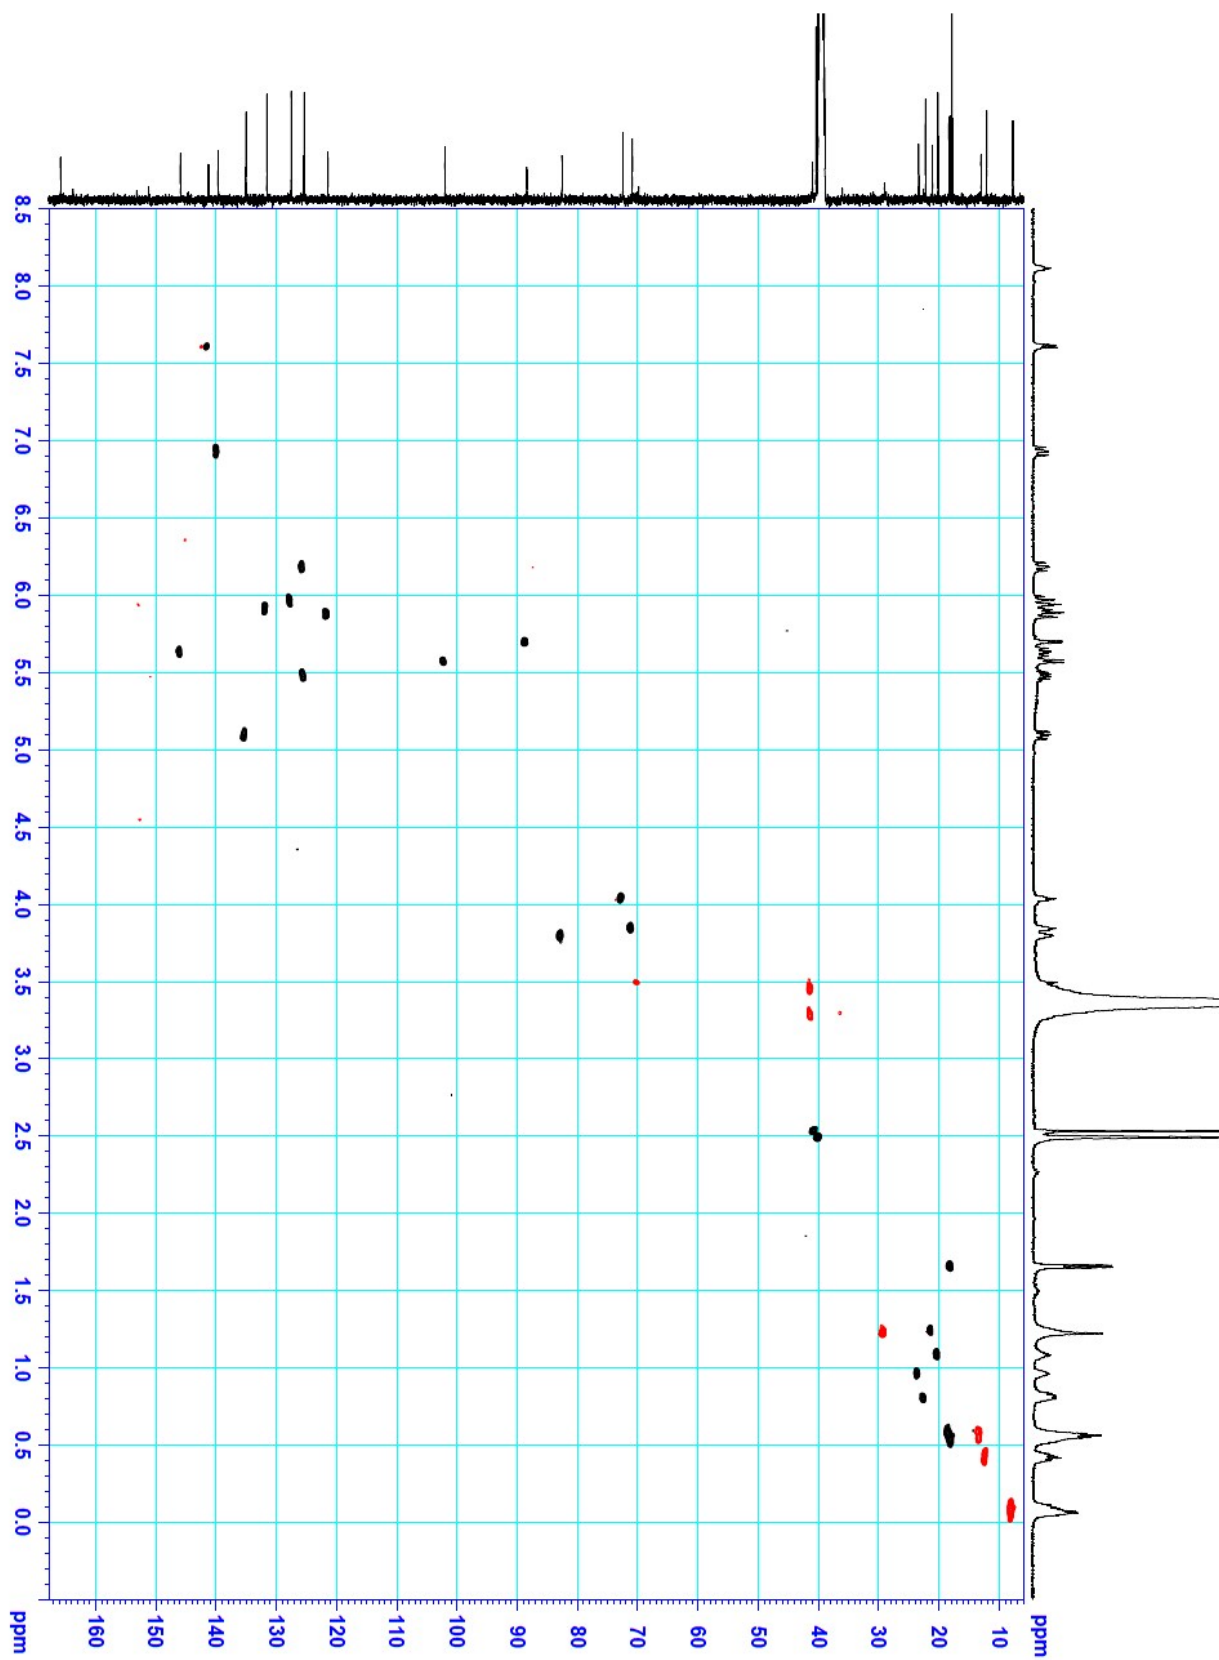

HMBC spectrum of 2a

ans5036\_2612 Hiratsuka nona-CP4-1 1.0mg/0.06ml DMSO  
d1(DMSO)=2.49 ppm, dC(DMSO)=39.5 ppm

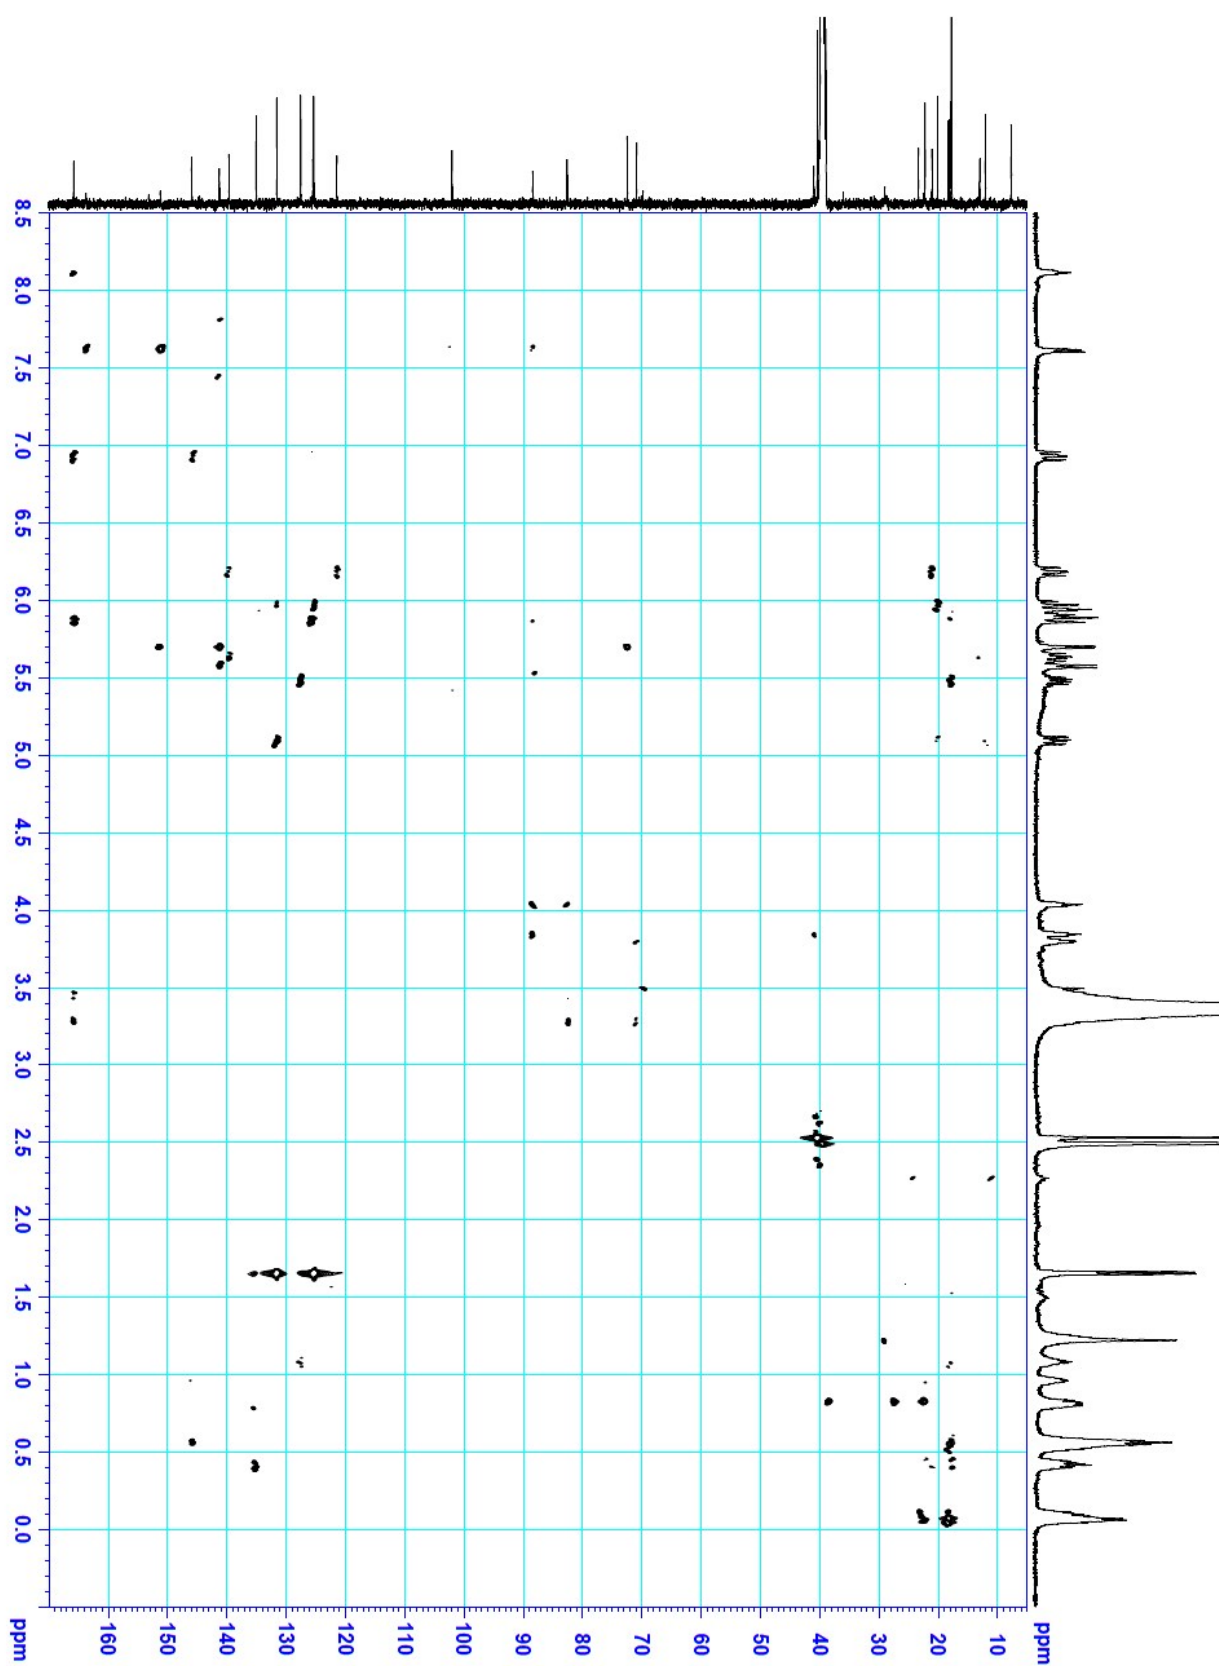

<sup>1</sup>H-NMR spectrum of 3

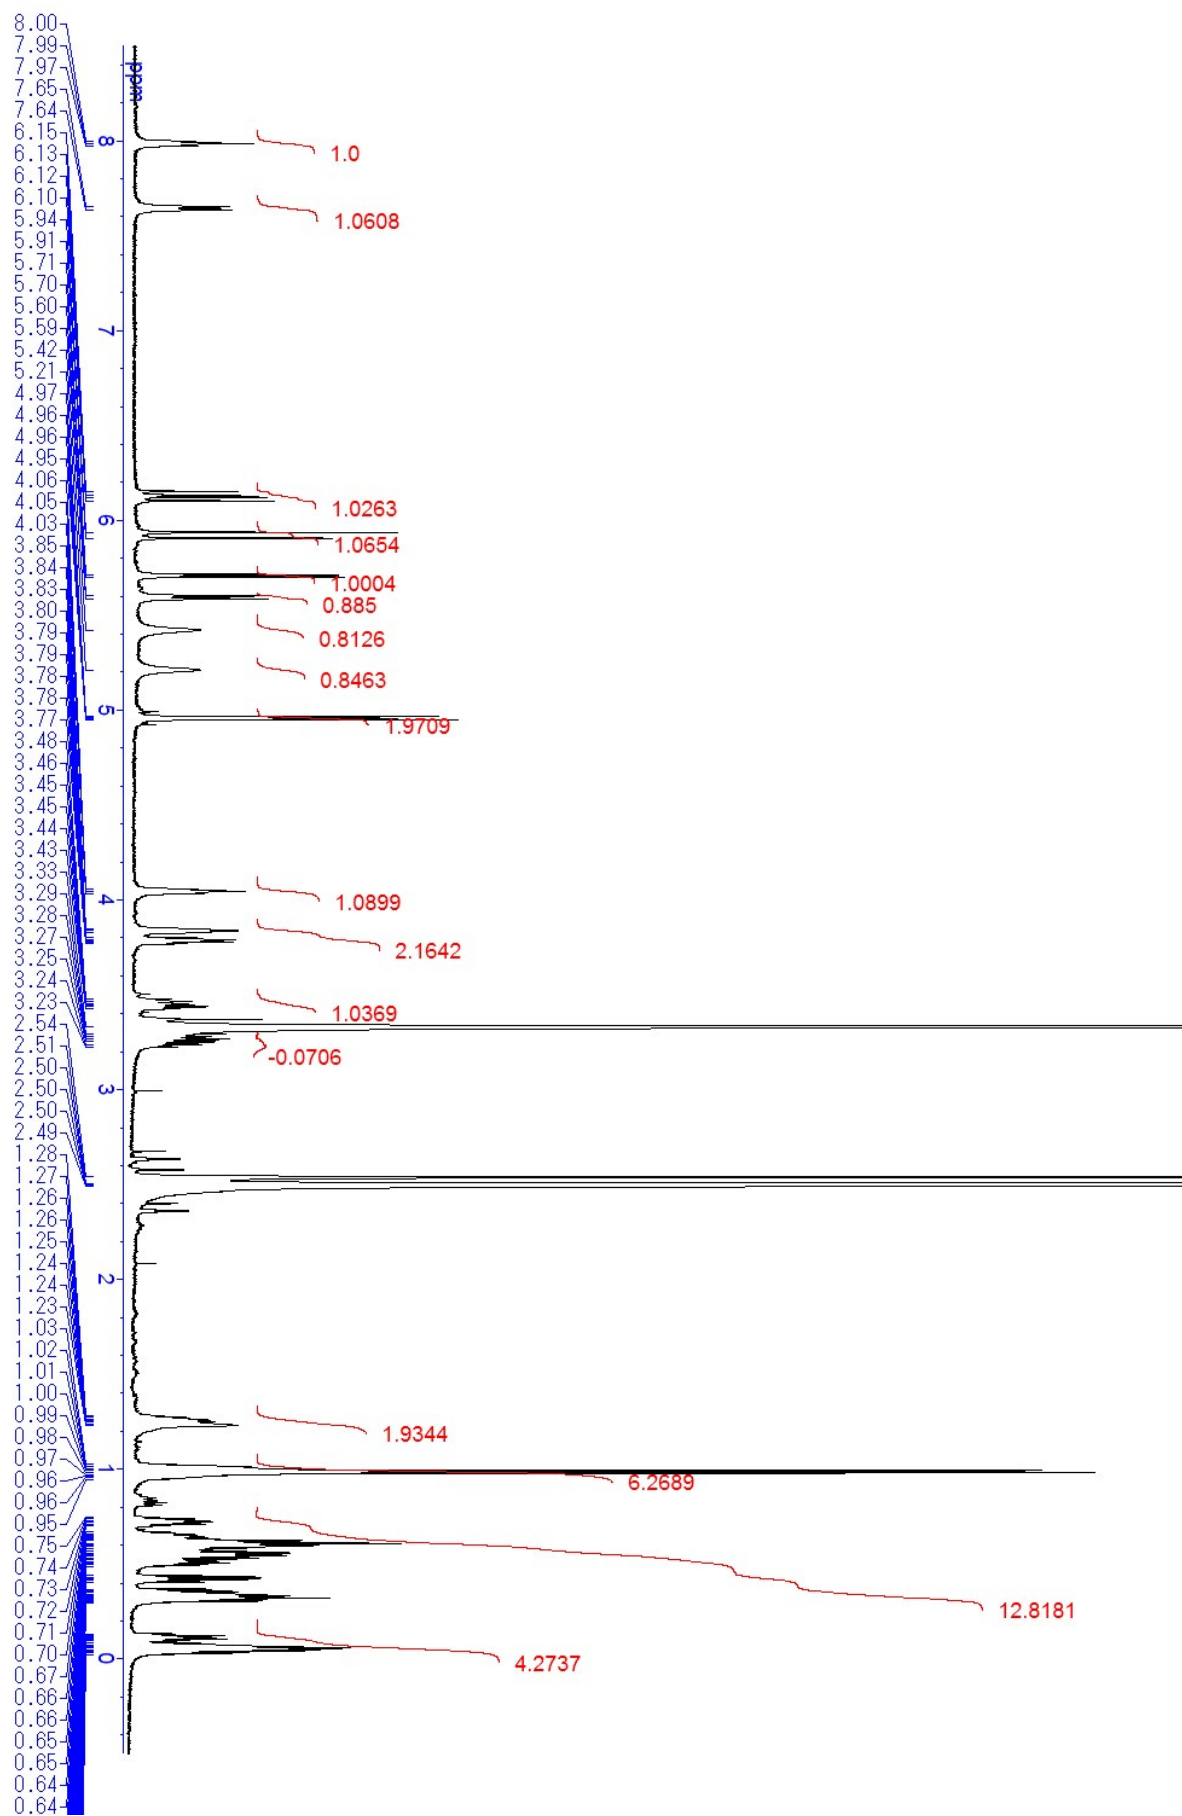

<sup>13</sup>C-NMR spectrum of 3

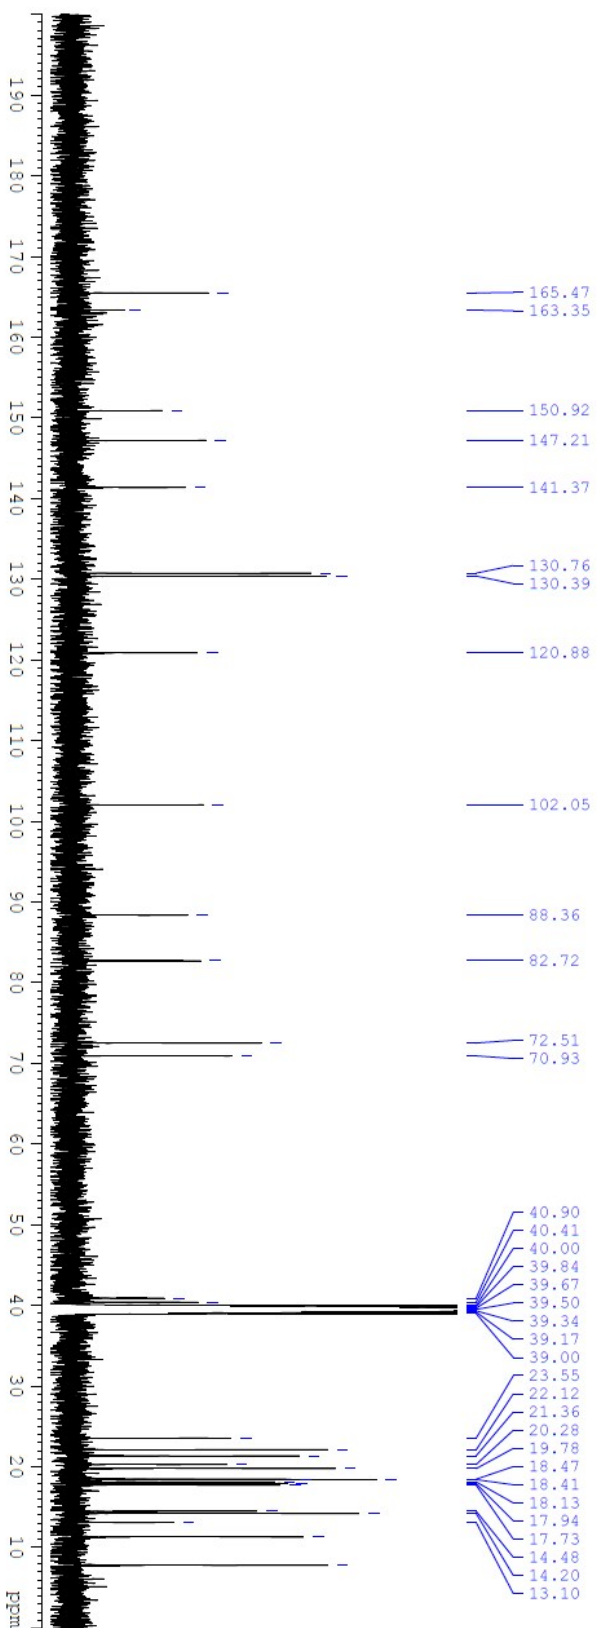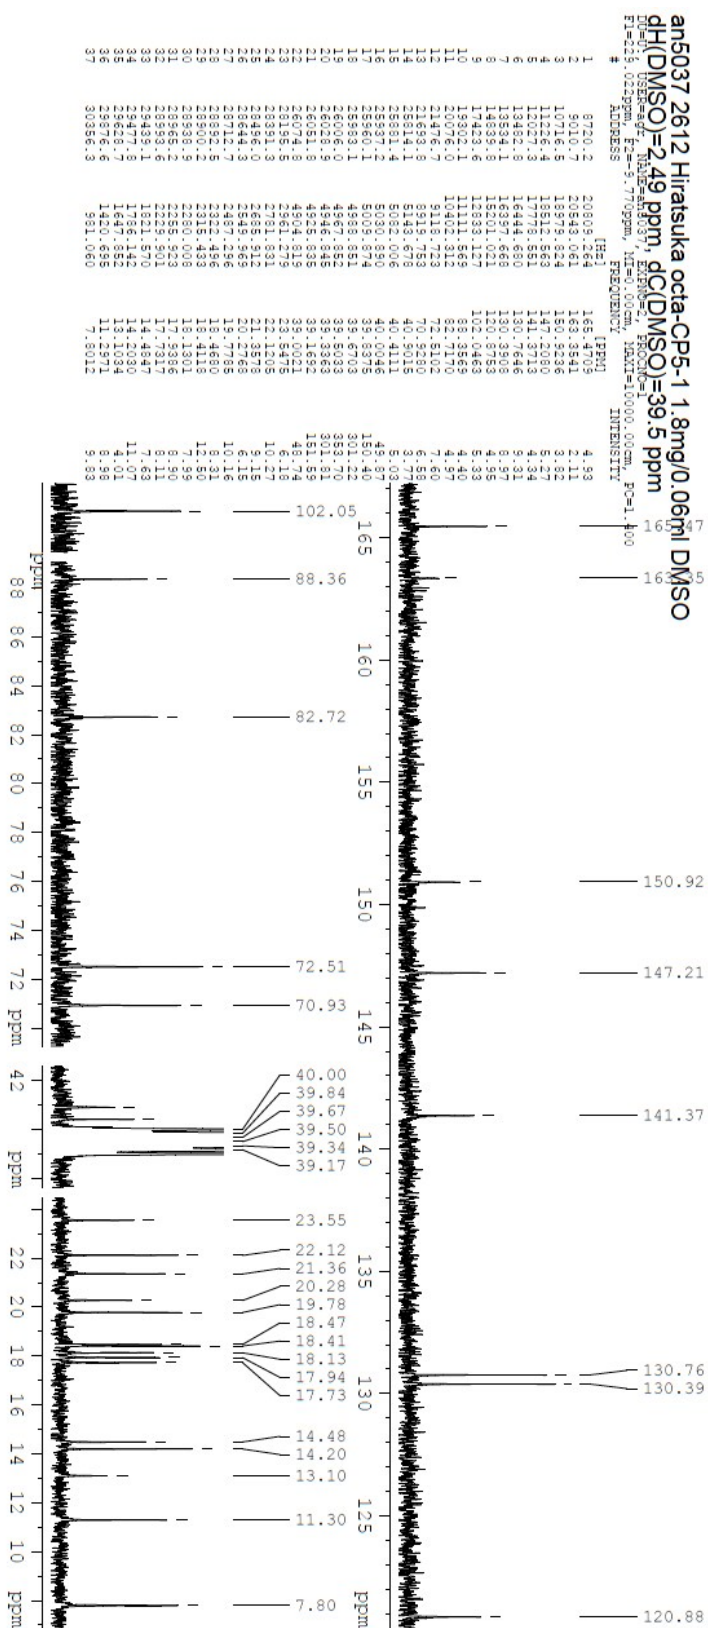



HSQC spectrum of 3

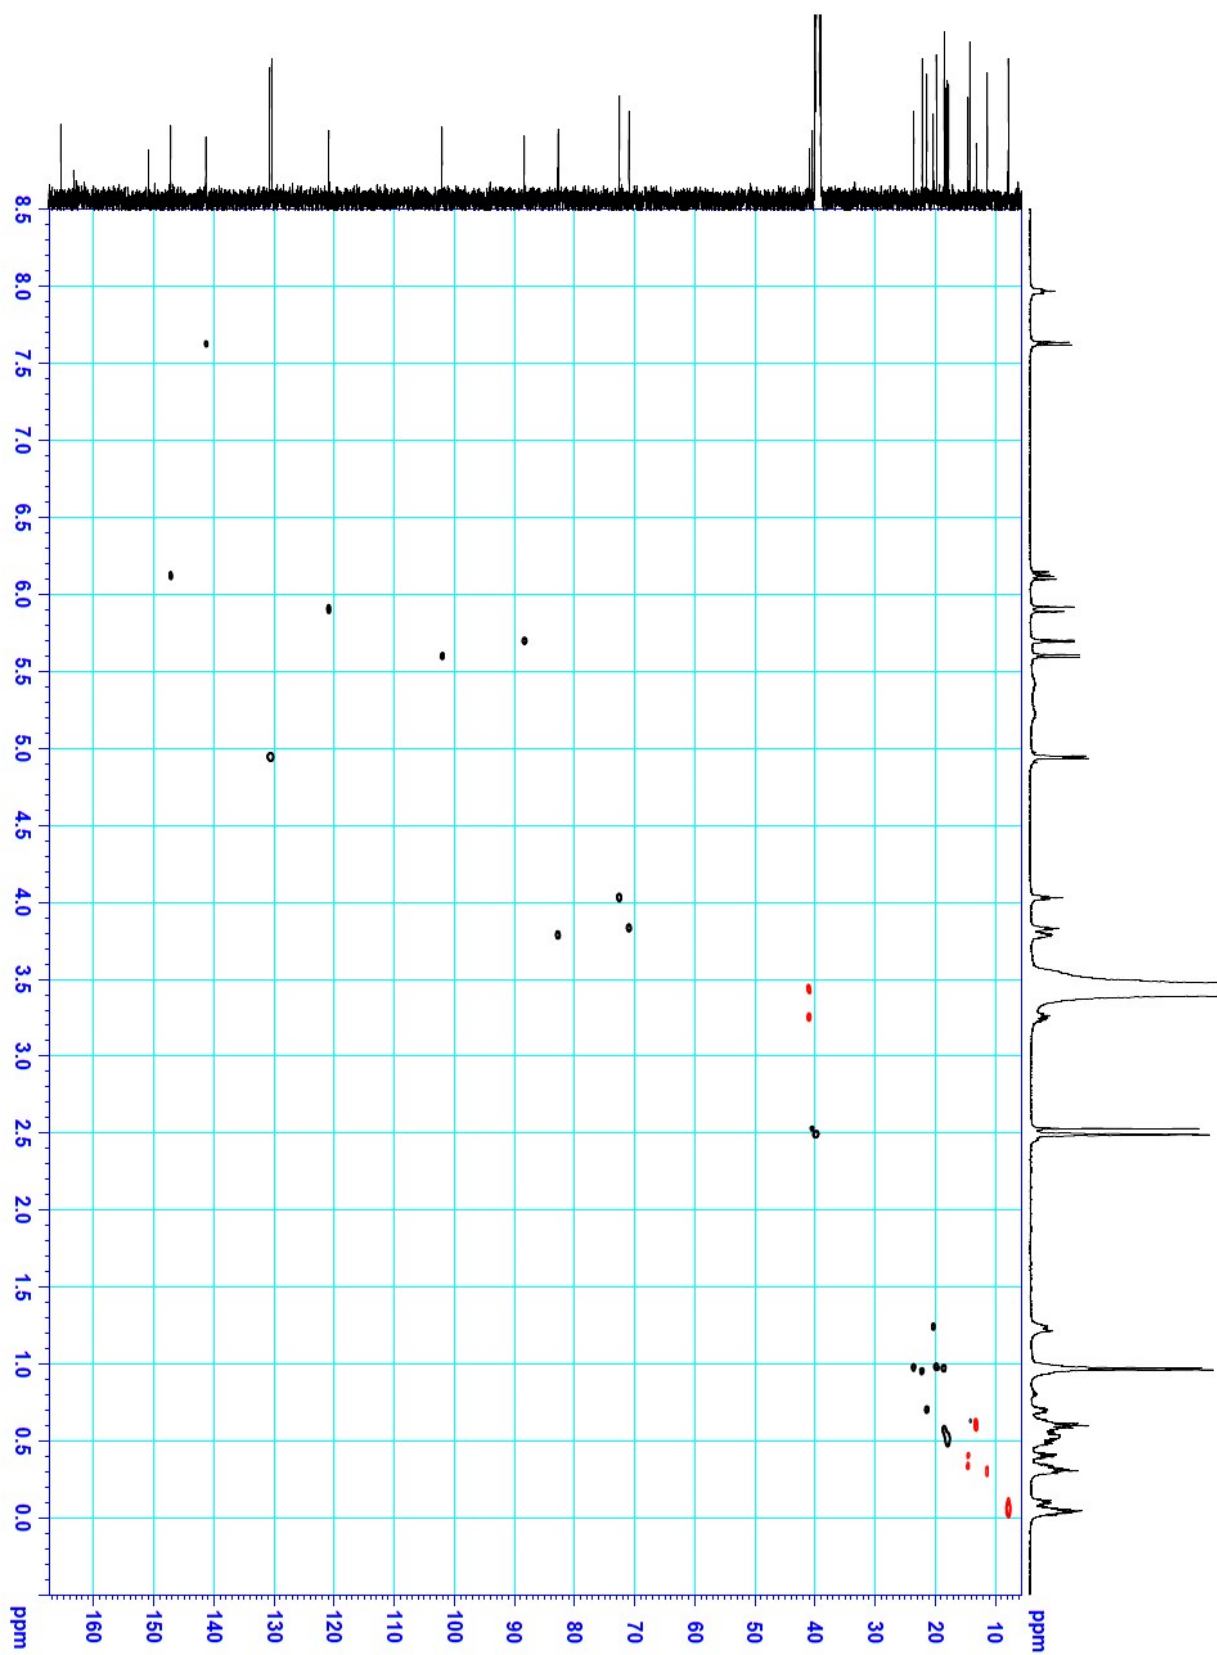

an5037 2612 Hiratsuka octa-CP5-1 1.8mg/0.06ml DMSO  
dH(DMSO)=2.49 ppm, dC(DMSO)=39.5 ppm

HMBC spectrum of 3

an5037 2612 Hiratsuka octa-CP5-1 1.8mg/0.06ml DMSO  
dH(DMSO)=2.49 ppm, dC(DMSO)=39.5 ppm

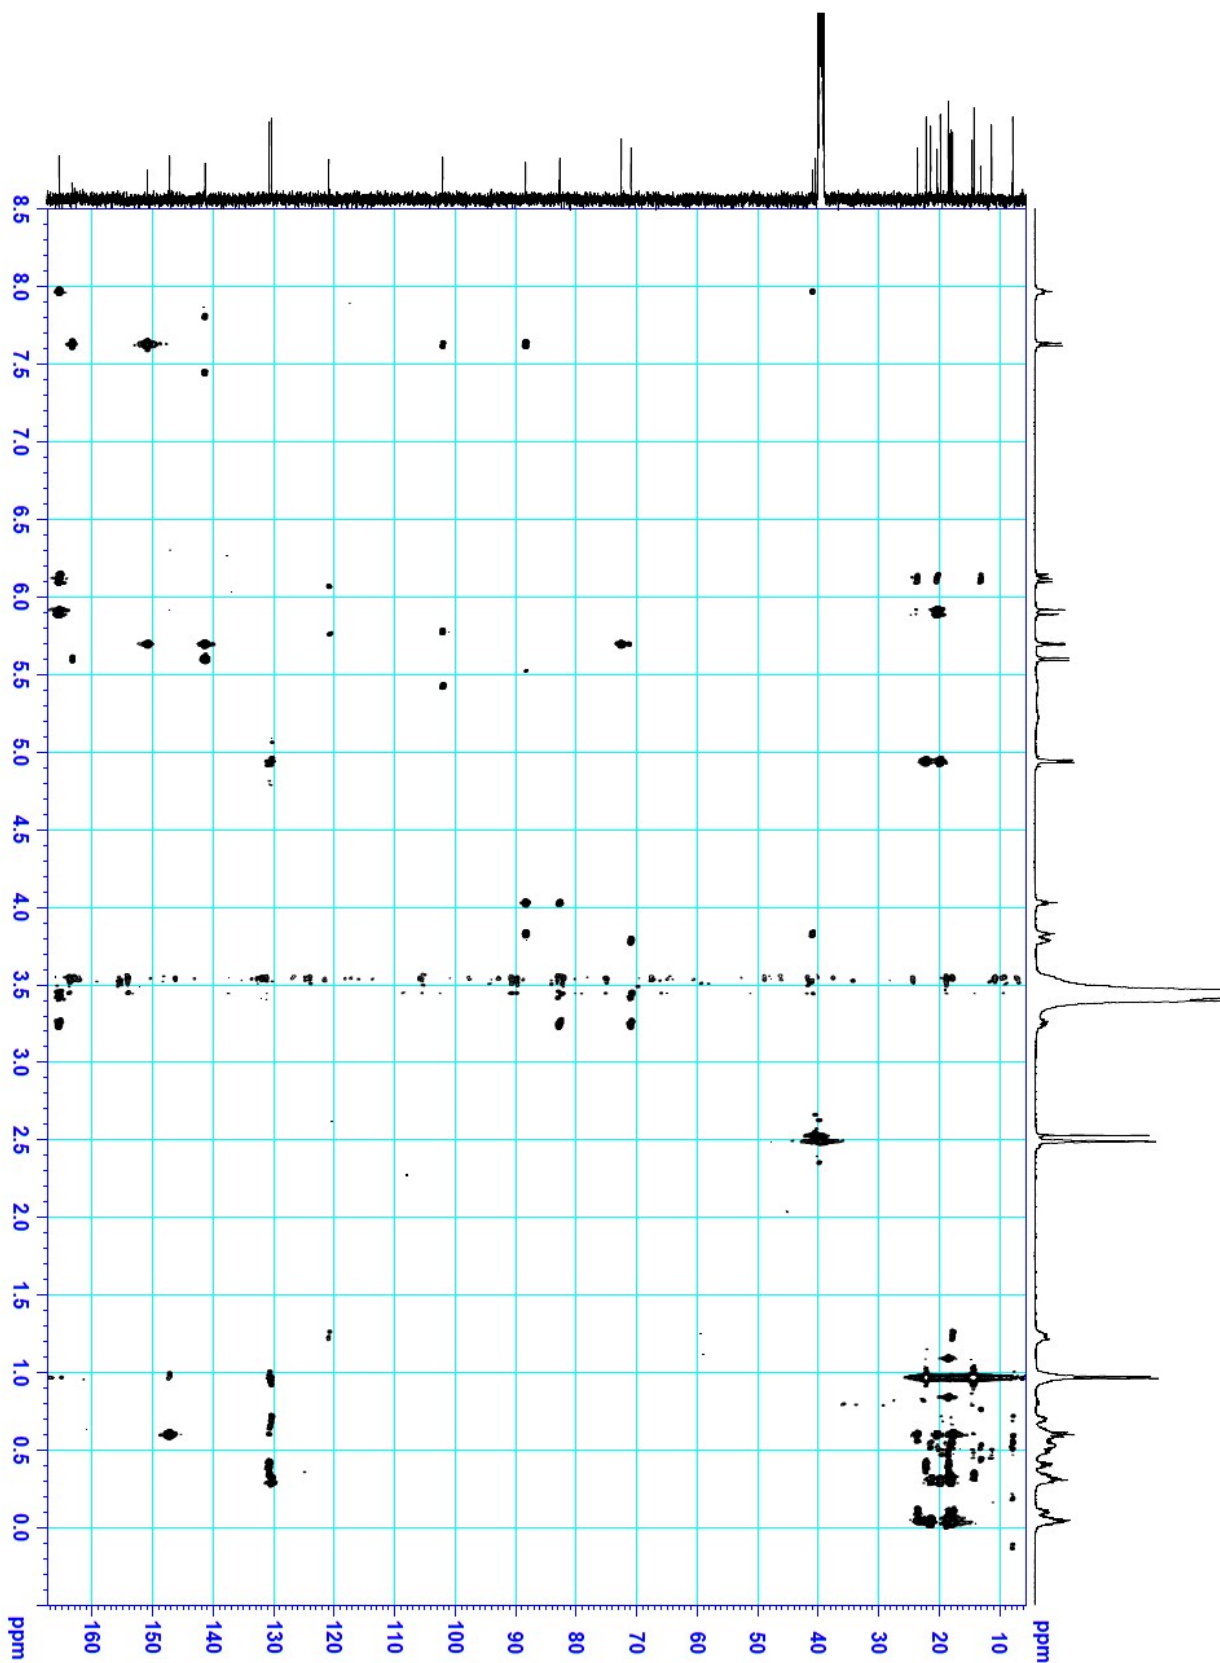

<sup>1</sup>H-NMR spectrum of 4

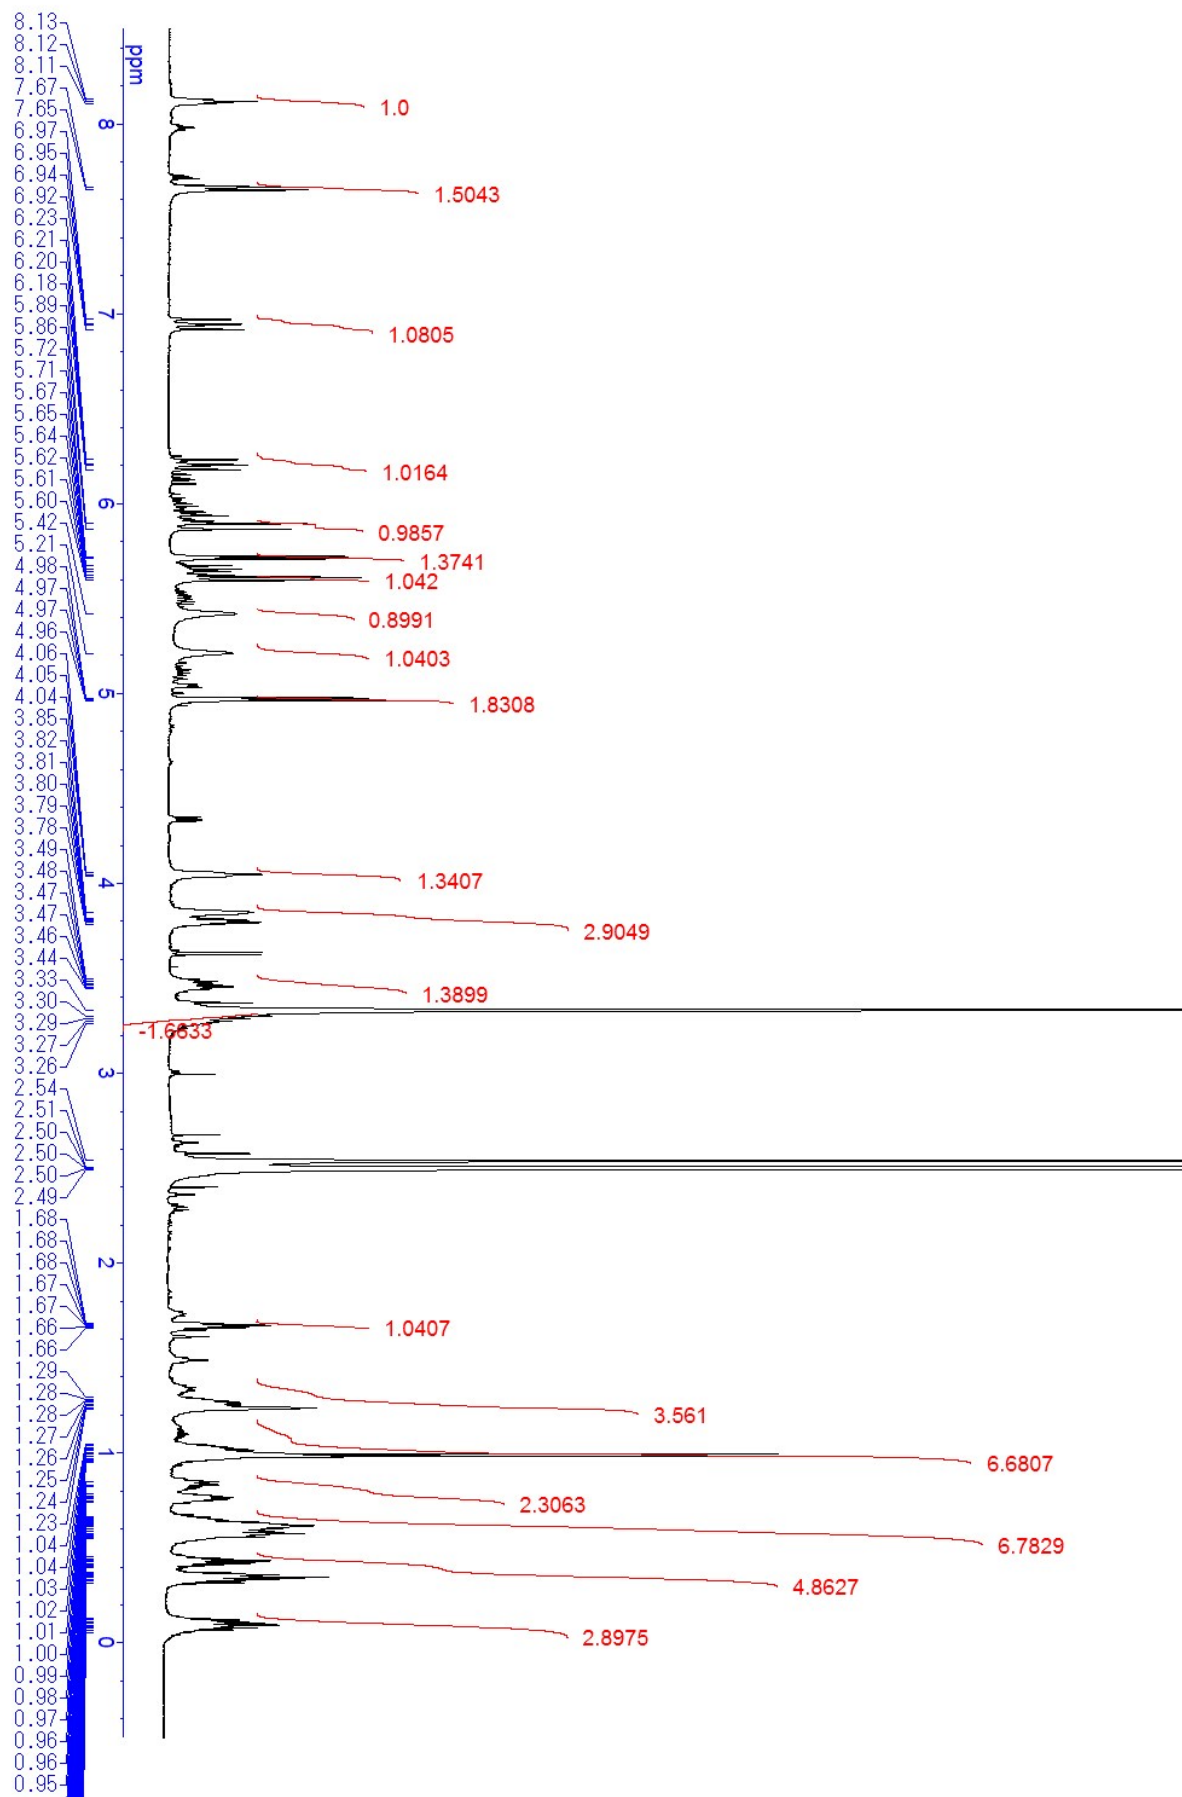



<sup>1</sup>H-NMR spectrum of 3a

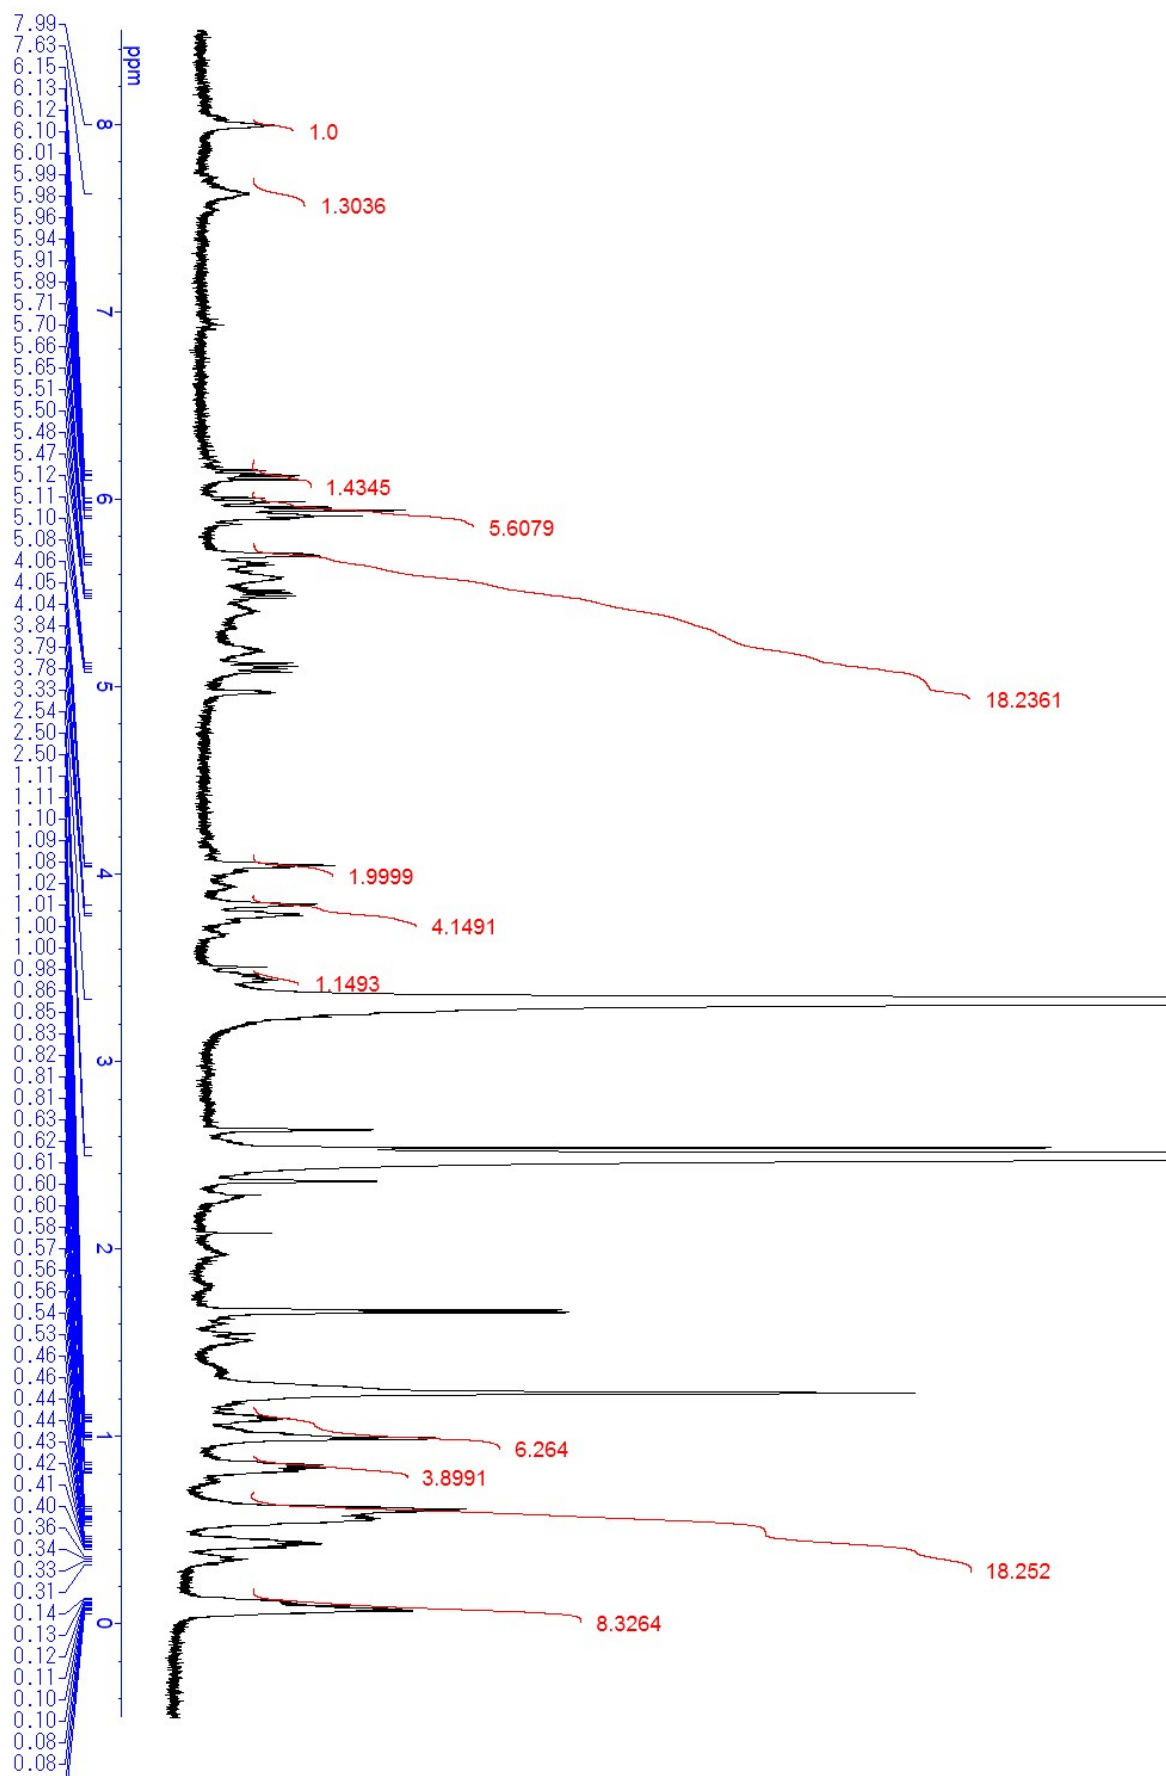

<sup>1</sup>H-NMR spectrum of 4a

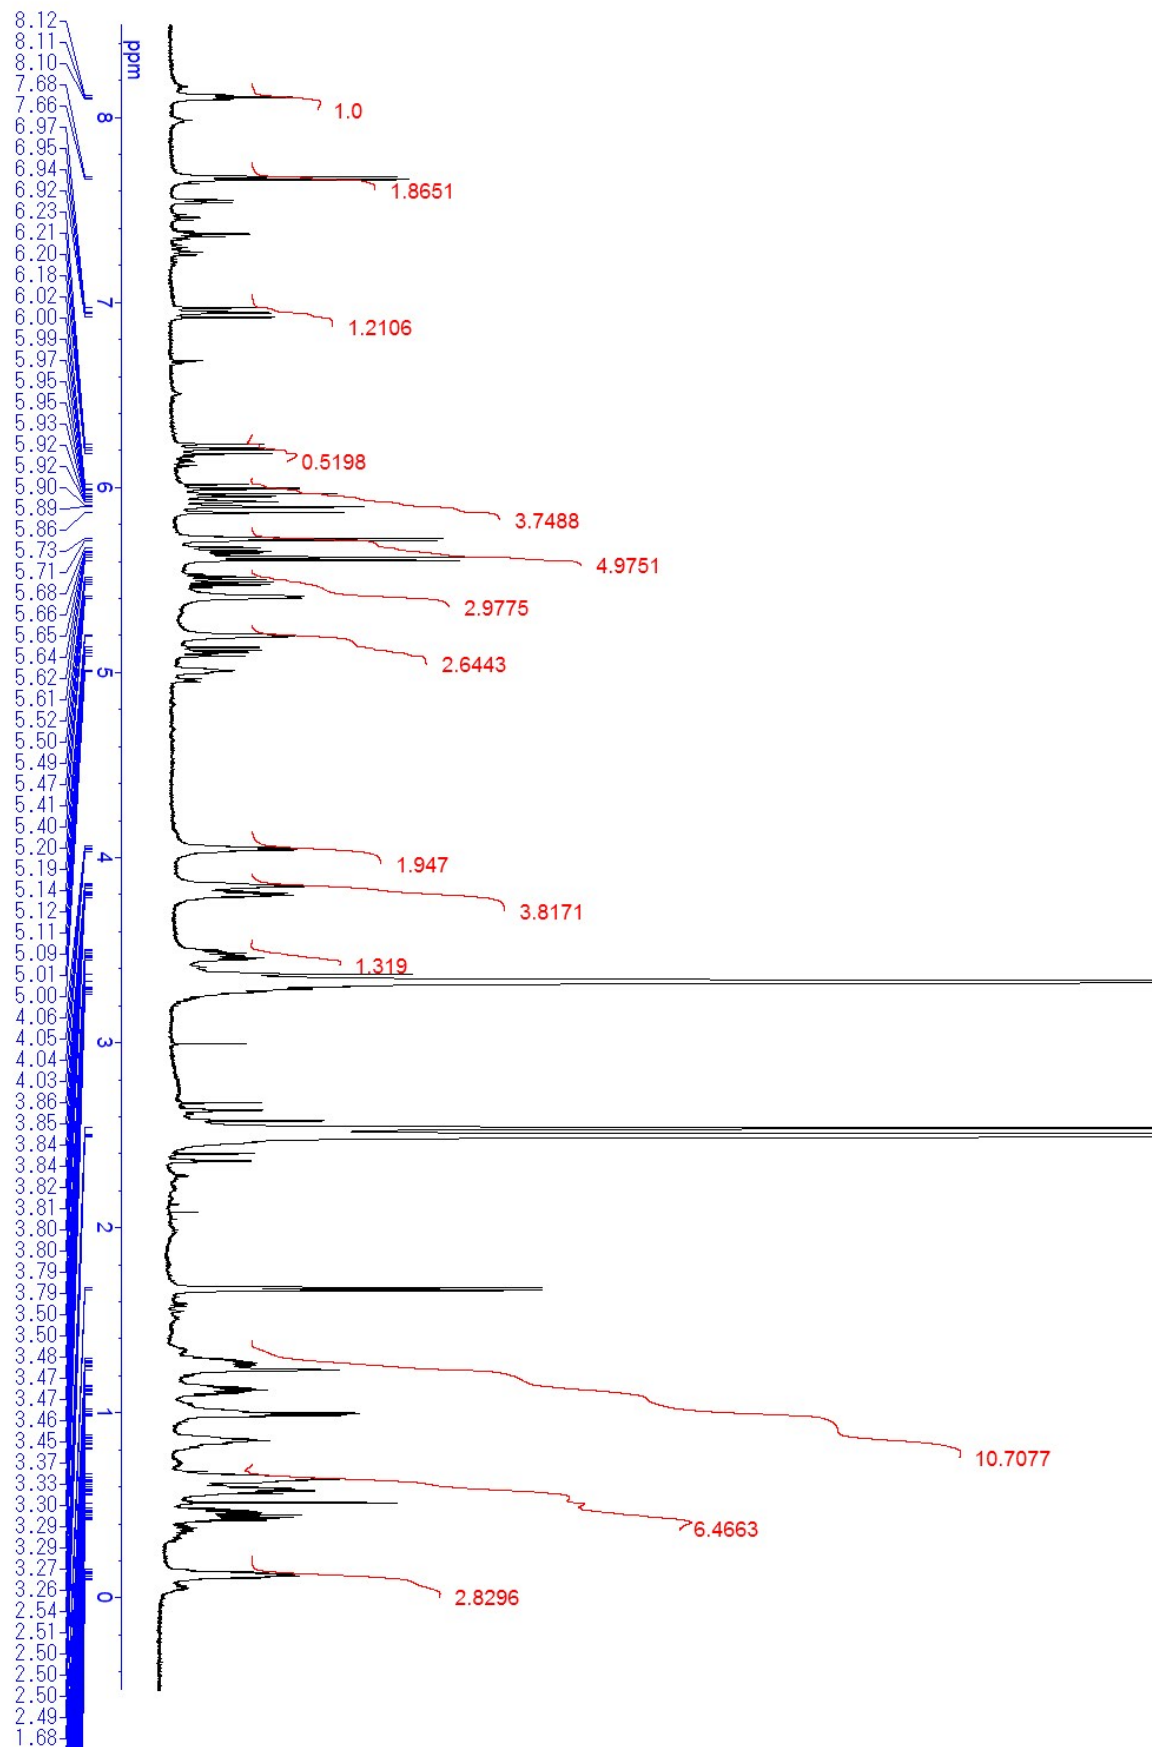

Supplement: c6ob02675c1.pdf [file c6ob02675c1.pdf]
